# Supplementary material for: Pyrrolidine and piperidine based chiral spiro and fused scaffolds via build/couple/pair approach
Source: Royal Society of Chemistry journal article supplement (doi:10.1039/c3ra47714b), 2014-01-01
Supplement: c3ra47714b1.xlsx [file c3ra47714b1.xlsx]

## Sheet: Avg
AVGs	Drug	NP	ChBr	ChDv	MC_NP	MC_CPD	Method of Determination
MW	360.978	628.955	381.458	446.426	302.834	284.228	DS2.5
N	2.175	2.58333	4.3	4.7	0.208333	2.09091	DS2.5
O	2.925	9.68333	3.1	3.4	4.875	2.90909	DS2.5
HBD	1.5	4.86667	1.1	1.9	1.66667	1.81818	DS2.5
HBA	5.35	10.7833	5.9	7.7	5.04167	3.45455	DS2.5
RotB	6.325	9.66667	5.3	6.1	2.04167	1.54545	DS2.5
tPSA	68.94	183.193	102.92	93.61	76.575	103.473	DS2.5
nStereo	1.35	9.1	0	1	4.41667	3	DS2.5
R	0.575	4.11667	0	0.5	2.16667	0.818182	DS2.5
S	0.775	4.98333	0	0.5	2.25	2.18182	DS2.5
nStMW†	3.65408	13.9316	0	2.2466	13.0823	0.0104855	Microsoft Excel
RSdelta	-0.2	-0.866667	0	0	-0.0833333	-1.36364	Microsoft Excel
Rings	2.85	3.76667	3.2	4.2	1.625	3.72727	Manual
RngAr	2.1	0.95	2.9	2.9	0.125	1.36364	DS2.5
RngSys	2.1	1.95	3.1	3.1	1.20833	2.18182	Manual
RngLg	8.425	15.8333	6.3	9.4	12.25	13.3636	Manual
RRSys	1.41875	2.27083	1.03333	1.35833	1.39583	1.87121	Microsoft Excel
ALOGPs	2.84325	2.148	3.268	2.746	1.83958	1.54736	DS2.5
ALOGpS	-3.94225	-3.81933	-4.007	-3.771	-2.39792	-2.68909	DS2.5
XLogP	2.7025	1.482	2.91	1.83	2.01917		not considered

## Sheet: Raw
	MW	N	O	HBD	HBA	RotB	tPSA	nStereo	R	S	nStMW	RSdelta	Rings	RngAr	RngSys	RngLg	RRSys	ALOGPs	ALOGpS
Lipitor	0.402869	-0.126951	-0.166963	0.350235	-0.0783051	0.885837	-0.0806868	-0.488861	-0.0459111	-0.822241	-0.749392	1.17279	0.45046	1.85335	1.83191	-0.778525	-0.543159	1.05753	-1.73524
Nexium	-0.417598	0.252858	-0.577398	-0.5394	-0.277498	-0.232211	-0.437456	-0.666086	-0.400172	-0.822241	-0.841016	0.703533	-0.107007	1.13729	-0.0453198	-0.397086	-0.177196	-0.242633	0.411985
Prevacid	-0.325466	0.252858	-0.782615	-0.5394	0.120888	-0.232211	-0.531505	-0.666086	-0.577302	-0.665853	-0.866114	0.234274	-0.107007	1.13729	-0.0453198	-0.397086	-0.177196	0.276317	0.27462
Flonase	0.179417	-0.88657	-0.166963	-0.5394	0.120888	-0.07249	-0.400655	0.751707	0.30835	1.05442	1.17637	-1.1735	0.45046	-1.01089	-0.983934	0.620085	1.65262	0.756207	-0.788146
Serevent	-0.147662	-0.506761	-0.37218	0.350235	-0.476691	1.52472	-0.387366	-0.666086	-0.577302	-0.665853	-0.906373	0.234274	-0.664473	0.421228	-0.0453198	-0.778525	-0.543159	0.823168	-1.23639
Singulair	0.508843	-0.506761	-0.577398	-0.242855	-0.675884	0.885837	-0.505948	-0.666086	-0.400172	-0.822241	-1.00004	0.703533	1.00793	1.85335	1.83191	-0.269939	-0.360177	2.74273	-3.10888
Effexor	-0.67933	-0.506761	-0.782615	-0.5394	-0.875077	-0.232211	-0.891341	-0.666086	-0.577302	-0.665853	-0.746081	0.234274	-0.664473	-0.294832	-0.0453198	-0.778525	-0.543159	0.192615	0.339688
Plavix	-0.50841	-0.506761	-1.19305	-0.835945	-0.875077	-0.391932	-0.924053	-0.666086	-0.754433	-0.509464	-0.812623	-0.234985	-0.107007	0.421228	-0.0453198	-0.397086	-0.177196	0.834328	-0.636322
Zocor	-0.136133	-0.88657	-0.166963	-0.5394	-0.476691	0.0872312	-0.481414	0.397259	0.662611	0.116091	1.00842	0.703533	-0.107007	-1.01089	-0.0453198	-0.269939	-0.177196	1.2082	-0.708619
Norvasc	-0.17342	-0.126951	-0.166963	-0.242855	-0.0783051	0.566395	-0.204381	-0.666086	-0.577302	-0.665853	-0.901105	0.234274	-0.664473	-0.294832	-0.0453198	-0.778525	-0.543159	-0.06965	-0.860443
Lexapro	-0.498521	-0.126951	-0.987833	-0.835945	-0.675884	-0.232211	-0.854539	-0.666086	-0.754433	-0.509464	-0.815916	-0.234985	-0.107007	0.421228	-0.0453198	-0.397086	-0.177196	0.689245	-0.860443
Seroquel	-0.271039	0.252858	-0.782615	-0.5394	-0.476691	-0.07249	-0.731868	-0.84331	-0.754433	-0.822241	-1.22819	0.234274	0.45046	1.13729	-0.0453198	0.365793	0.188767	0.326538	-0.310986
Protonix	-0.271568	0.252858	-0.37218	-0.5394	0.320081	0.0872312	-0.343408	-0.666086	-0.577302	-0.665853	-0.879343	0.234274	-0.107007	1.13729	-0.0453198	-0.397086	-0.177196	-0.131031	0.477052
Ambien	-0.563939	0.252858	-0.987833	-0.835945	-0.875077	-0.551654	-0.84125	-0.84331	-0.754433	-0.822241	-1.22819	0.234274	-0.107007	1.13729	-0.0453198	-0.397086	-0.177196	0.4493	-0.318215
Actos	-0.375198	-0.126951	-0.577398	-0.5394	-0.675884	0.0872312	-0.834094	-0.666086	-0.577302	-0.665853	-0.852985	0.234274	-0.107007	0.421228	0.893294	-0.778525	-0.543159	0.460461	-0.983348
Zoloft	-0.568402	-0.506761	-1.19305	-0.5394	-1.27346	-0.711375	-1.10295	-0.488861	-0.754433	-0.196687	-0.354738	-0.704244	-0.107007	0.421228	-0.0453198	-0.269939	-0.177196	1.5151	-2.00274
Wellbutrin	-0.824249	-0.506761	-0.987833	-0.5394	-1.07427	-0.391932	-0.928142	-0.666086	-0.577302	-0.665853	-0.670346	0.234274	-1.22194	-0.294832	-0.983934	-0.778525	-0.543159	0.521842	0.00712118
Avandia	-0.371396	0.252858	-0.577398	-0.5394	-0.476691	0.0872312	-0.494703	-0.666086	-0.754433	-0.509464	-0.854022	-0.234985	-0.107007	0.421228	0.893294	-0.778525	-0.543159	0.337698	-0.303756
Risperdal	-0.167233	0.632667	-0.782615	-0.835945	-0.277498	-0.391932	-0.59284	-0.84331	-0.754433	-0.822241	-1.22819	0.234274	1.00793	1.13729	0.893294	-0.269939	-0.0552085	0.521842	0.122796
Zyprexa	-0.544533	0.632667	-1.19305	-0.5394	-0.675884	-0.871096	-0.909742	-0.84331	-0.754433	-0.822241	-1.22819	0.234274	0.45046	1.13729	-0.0453198	0.238646	0.188767	0.170295	0.549349
Topamax	-0.440909	-0.506761	0.44869	-0.5394	0.320081	-0.551654	-0.0397963	-0.134413	-0.0459111	-0.196687	0.348163	0.234274	-0.107007	-1.01089	-0.983934	-0.0156465	0.920692	-0.5886	1.33739
Toprol	-0.717957	-0.506761	-0.577398	-0.242855	-0.675884	0.406674	-0.707334	-0.666086	-0.577302	-0.665853	-0.727981	0.234274	-1.22194	-0.294832	-0.983934	-0.778525	-0.543159	-0.304015	0.52766
Zetia	-0.171308	-0.506761	-0.577398	-0.242855	-0.476691	-0.07249	-0.604085	-0.311637	-0.400172	-0.196687	-0.248242	-0.234985	0.45046	1.13729	1.83191	-0.778525	-0.543159	1.00173	-0.817065
Fosamax	-0.788251	-0.506761	0.243472	0.943325	0.120888	-0.232211	0.420222	-0.84331	-0.754433	-0.822241	-1.22819	0.234274	-1.77941	-1.01089	-1.92255	-1.5414	-1.27508	-2.05617	1.72056
Abilify	-0.0213902	0.252858	-0.782615	-0.5394	-0.675884	0.0872312	-0.767647	-0.84331	-0.754433	-0.822241	-1.22819	0.234274	0.45046	0.421228	0.893294	-0.269939	-0.299184	1.5988	-0.874903
Levaquin	-0.356234	0.252858	-0.37218	-0.5394	0.120888	-0.711375	-0.476302	-0.666086	-0.754433	-0.509464	-0.858102	-0.234985	0.45046	0.421228	-0.0453198	-0.0156465	0.188767	-1.3196	0.831307
Lamictal	-0.761335	1.01248	-1.19305	-0.242855	-0.476691	-0.871096	-0.298429	-0.84331	-0.754433	-0.822241	-1.22819	0.234274	-0.664473	0.421228	-0.0453198	-0.778525	-0.543159	-0.264954	0.599957
Celebrex	-0.279255	0.252858	-0.782615	-0.5394	0.120888	-0.551654	-0.428256	-0.84331	-0.754433	-0.822241	-1.22819	0.234274	-0.107007	1.13729	0.893294	-0.778525	-0.543159	0.91803	-0.961659
Benazepril	-0.113338	-0.126951	-0.166963	-0.242855	-0.277498	0.566395	-0.245271	-0.488861	-0.754433	-0.196687	-0.598078	-0.704244	-0.107007	0.421228	-0.0453198	-0.142793	-0.177196	-0.672302	-0.766457
Zyrtec	-0.250335	-0.126951	-0.577398	-0.5394	-0.476691	0.246952	-0.683822	-0.666086	-0.577302	-0.665853	-0.884293	0.234274	-0.107007	0.421228	0.893294	-0.778525	-0.543159	0.354439	-0.159162
Coreg	-0.182663	-0.126951	-0.37218	0.0536899	-0.277498	0.566395	-0.451768	-0.666086	-0.577302	-0.665853	-0.899172	0.234274	0.45046	1.85335	-0.0453198	0.1115	0.188767	0.393499	-1.0195
Valtrex	-0.49873	1.39229	-0.37218	0.0536899	0.320081	0.246952	0.277105	-0.666086	-0.754433	-0.509464	-0.815847	-0.234985	-0.664473	0.421228	-0.983934	-0.397086	0.188767	-1.77716	1.14941
Adderall	-1.2265	-0.506761	-1.19305	-0.5394	-1.27346	-0.711375	-0.959832	-0.666086	-0.577302	-0.665853	-0.239044	0.234274	-1.22194	-0.294832	-0.983934	-0.778525	-0.543159	-0.276114	1.20002
Aciphex	-0.363641	0.252858	-0.577398	-0.5394	-0.277498	0.246952	-0.437456	-0.666086	-0.577302	-0.665853	-0.85612	0.234274	-0.107007	1.13729	-0.0453198	-0.397086	-0.177196	-0.164512	0.375836
Cymbalta	-0.602322	-0.506761	-0.987833	-0.5394	-1.07427	-0.07249	-1.00788	-0.666086	-0.754433	-0.509464	-0.778522	-0.234985	-0.107007	1.13729	-0.0453198	-0.269939	-0.177196	1.32538	-1.04842
Crestor	0.106182	0.252858	0.0382547	0.0536899	0.519274	0.566395	0.215769	-0.488861	-0.0459111	-0.822241	-0.672728	1.17279	-0.664473	0.421228	-0.0453198	-0.778525	-0.543159	-0.488158	-0.137473
Diovan	-0.0708995	1.01248	-0.577398	-0.242855	-0.0783051	0.566395	-0.0806868	-0.666086	-0.754433	-0.509464	-0.921114	-0.234985	-0.107007	1.13729	0.893294	-0.778525	-0.543159	0.745046	-0.520647
Tricor	-0.358297	-0.88657	-0.37218	-0.835945	-0.675884	0.0872312	-0.687911	-0.84331	-0.754433	-0.822241	-1.22819	0.234274	-0.664473	0.421228	-0.0453198	-0.778525	-0.543159	1.4035	-1.56172
Concerta	-0.84901	-0.506761	-0.782615	-0.5394	-0.875077	-0.391932	-0.834094	-0.488861	-0.400172	-0.509464	-0.0817263	0.234274	-0.664473	-0.294832	-0.0453198	-0.778525	-0.543159	-0.488158	0.317998
Imitrex	-0.610074	0.252858	-0.782615	-0.242855	-0.476691	-0.07249	-0.559106	-0.84331	-0.754433	-0.822241	-1.22819	0.234274	-0.664473	0.421228	-0.983934	-0.397086	0.188767	-0.655562	0.130026
AVG-DRUG	-0.357731	-0.0604846	-0.592789	-0.391128	-0.406974	-0.0205806	-0.520873	-0.604057	-0.550733	-0.579839	-0.739501	0.140422	-0.190627	0.492833	0.0485416	-0.470195	-0.236665	0.278131	-0.283694
Forskolin	-0.167171	-0.88657	0.243472	0.0536899	-0.0783051	-0.551654	-0.0704642	0.574483	0.30835	0.741645	1.37817	-0.704244	-0.107007	-1.01089	-0.983934	0.238646	0.920692	-0.594181	0.708402
SQ26180	-0.830108	-0.126951	0.0382547	-0.242855	-0.277498	-0.551654	-0.0704642	-0.666086	-0.400172	-0.822241	-0.666781	0.703533	-1.22194	-1.01089	-0.983934	-1.03282	-0.543159	-2.16219	1.54705
CephamycinC	-0.0289043	0.632667	0.653907	0.64678	0.519274	0.726116	0.941575	-0.311637	-0.0459111	-0.509464	-0.329476	0.703533	-0.664473	-1.01089	-0.983934	-0.524232	0.188767	-2.68114	0.896375
Thienamycin	-0.698883	-0.126951	-0.37218	0.0536899	-0.476691	-0.232211	-0.162468	-0.311637	0.30835	-0.822241	0.245131	1.64205	-0.664473	-1.01089	-0.983934	-0.651378	0.188767	-1.96131	1.35185
Artemisinin	-0.660359	-0.88657	-0.166963	-0.835945	-0.476691	-1.03082	-0.673599	0.397259	0.662611	0.116091	2.08766	0.703533	0.45046	-1.01089	-0.983934	0.365793	1.65262	0.0977534	0.867456
Coformycin	-0.652908	0.632667	-0.166963	0.64678	0.320081	-0.711375	0.123766	0.0428109	0.662611	-0.509464	1.12414	1.64205	-0.107007	-0.294832	-0.0453198	-0.269939	-0.177196	-2.39098	1.62657
Arglabin	-0.799004	-0.88657	-0.577398	-0.835945	-0.875077	-1.03082	-0.828983	0.0428109	-0.400172	0.428868	1.48675	-1.1735	0.45046	-1.01089	-0.983934	0.238646	1.65262	0.231676	0.556579
Mizoribine	-0.74931	0.252858	0.0382547	0.64678	0.120888	-0.551654	0.317995	-0.134413	0.30835	-0.509464	0.835551	1.17279	-0.664473	-0.294832	-0.0453198	-0.905671	-0.543159	-2.59744	1.94468
Compactin	-0.244081	-0.88657	-0.166963	-0.5394	-0.476691	0.0872312	-0.481414	0.397259	0.30835	0.428868	1.16909	-0.234985	-0.107007	-1.01089	-0.0453198	-0.269939	-0.177196	0.996152	-0.383283
Bestatin	-0.560155	-0.126951	-0.37218	0.350235	-0.476691	0.246952	-0.0704642	-0.311637	-0.400172	-0.196687	0.0728835	-0.234985	-1.22194	-0.294832	-0.983934	-0.778525	-0.543159	-1.97805	0.845767
Plaunotol	-0.567428	-0.88657	-0.782615	-0.242855	-1.07427	0.726116	-0.811604	-0.84331	-0.754433	-0.822241	-1.22819	0.234274	-1.77941	-1.01089	-1.92255	-1.5414	-1.27508	1.44256	-0.650782
Spergualin	-0.194029	1.7721	-0.37218	1.23987	0.320081	1.84416	0.716678	-0.666086	-0.754433	-0.509464	-0.896763	-0.234985	-1.77941	-1.01089	-1.92255	-1.5414	-1.27508	-1.93899	0.137256
Taxol	1.53905	-0.506761	1.67999	0.350235	1.31605	1.20528	1.03358	1.10616	0.662611	1.3672	0.494628	-1.1735	2.12286	1.13729	1.83191	0.492939	0.00578534	0.477201	-1.18578
Rapamycin	1.77095	-0.506761	1.47478	0.0536899	1.11685	-0.07249	0.77236	1.81505	2.43391	1.05442	0.966234	1.64205	0.45046	-1.01089	-0.0453198	2.90872	0.188767	1.39792	-1.56895
AvermectinB1a	1.61282	-0.88657	1.67999	0.0536899	1.31605	0.246952	0.512225	2.70117	1.37113	3.55664	1.83543	-3.5198	2.12286	-1.01089	0.893294	2.0187	0.432742	1.04637	-1.10625
PseudomonicAcidA	0.179618	-0.88657	0.653907	0.350235	0.320081	1.68444	0.266882	0.574483	-0.0459111	1.05442	0.90897	-1.64276	-0.664473	-1.01089	-0.0453198	-0.778525	-0.543159	-0.0529097	-0.527877
Daptomycin	4.48955	5.57019	4.1426	5.68805	4.30394	4.55943	5.95066	1.4606	0.662611	1.99275	-0.155424	-2.11202	0.45046	1.13729	0.893294	2.40013	-0.299184	-1.56512	-1.02673
MidecamycinA1	1.38537	-0.506761	1.88521	0.0536899	1.71443	1.20528	0.88024	1.99228	2.43391	1.3672	1.40068	1.17279	-0.107007	-1.01089	0.893294	0.492939	-0.543159	0.41582	-0.282067
EchinocandinB	2.33301	1.7721	2.09043	3.31569	1.71443	2.16361	2.5363	1.81505	1.01687	2.30553	0.663916	-2.11202	0.45046	-0.294832	-0.0453198	1.89155	0.188767	-0.276114	-0.267608
CalicheamicinG1	3.51861	0.252858	3.11652	1.53642	3.10878	2.80249	1.92295	2.52395	1.37113	3.24386	0.628819	-3.05054	2.12286	-0.294832	3.70914	0.1115	-0.421171	0.365599	-1.08456
Validamycin	0.167568	-0.506761	1.47478	2.7226	1.31605	0.0872312	1.3607	1.63783	1.72539	1.3672	2.53538	0.234274	-0.107007	-1.01089	0.893294	-0.778525	-0.543159	-2.84297	2.08928
CyclosporinA	2.88086	3.29133	1.26956	0.64678	0.91766	1.365	1.62649	1.28338	0.30835	1.99275	0.106292	-2.58128	-1.22194	-1.01089	-0.983934	2.65443	-0.543159	0.990571	-1.12071
FK506	1.34708	-0.506761	1.26956	0.0536899	0.91766	0.0872312	0.594006	1.63783	2.78818	0.428868	1.10054	3.04983	0.45046	-1.01089	-0.0453198	1.89155	0.188767	0.471621	-1.26531
Lipstatin	0.145297	-0.506761	-0.166963	-0.5394	-0.476691	2.32333	-0.390432	-0.134413	-0.754433	0.428868	-0.140229	-1.64276	-1.22194	-1.01089	-0.983934	-1.03282	-0.543159	2.48046	-2.19794
Geldanamycin	0.41055	-0.126951	0.653907	0.0536899	0.320081	-0.232211	0.45089	0.220035	-0.0459111	0.428868	0.203098	-0.704244	-0.664473	-0.294832	-0.983934	1.12867	0.188767	0.108914	-1.01227
Actinonin	-0.263378	0.252858	-0.166963	0.350235	-0.476691	0.726116	-0.00952714	-0.311637	-0.400172	-0.196687	-0.187418	-0.234985	-1.22194	-1.01089	-0.983934	-0.905671	-0.543159	-0.56628	1.0482
Discodermolide	0.538134	-0.506761	0.44869	0.64678	0.120888	1.68444	0.409999	1.4606	0.30835	2.30553	1.69978	-3.05054	-1.22194	-1.01089	-0.983934	-0.778525	-0.543159	0.627864	-0.874903
Monensin	0.834732	-0.88657	1.06434	0.350235	0.718467	0.566395	0.338441	2.1695	2.43391	1.67998	2.16078	0.703533	1.00793	-1.01089	1.83191	-0.269939	-0.360177	0.198195	-1.0701
CalyculinA	2.1365	0.632667	1.88521	1.53642	2.11282	3.12193	1.70827	1.81505	1.37113	1.99275	0.759662	-1.1735	-0.107007	-0.294832	-0.0453198	-0.269939	-0.177196	0.728306	-0.0434867
AmphotericinB	1.80907	-0.506761	2.29565	2.7226	2.11282	-0.551654	2.04562	2.52395	3.14244	1.67998	1.52161	1.64205	-0.107007	-1.01089	-0.0453198	3.29016	-0.177196	-1.67672	-0.361594
Adriamycin	0.344685	-0.506761	1.06434	0.943325	0.91766	-0.232211	0.881037	0.220035	-0.400172	0.741645	0.248173	-1.64276	1.00793	1.13729	-0.0453198	0.747232	0.554729	-0.521639	0.636105
GinkgolideB	-0.113692	-0.88657	0.859125	0.0536899	0.519274	-0.871096	0.29755	1.10616	1.72539	0.428868	2.23819	1.64205	1.56539	-1.01089	-0.983934	0.747232	3.11647	-1.03501	1.18556
PhorbolMA	0.626764	-0.88657	0.44869	0.0536899	0.120888	1.68444	0.10332	0.574483	0.662611	0.428868	0.506352	0.234274	0.45046	-1.01089	-0.983934	0.365793	1.65262	1.77737	-1.72078
Vancomycin	3.82992	2.53171	3.73217	4.79841	3.70636	1.04556	4.20259	2.8784	2.43391	2.93109	0.709717	-1.1735	3.79526	2.56941	0.893294	3.54445	1.16467	-0.683462	-0.188081
TrapoxinB	0.518517	0.632667	0.0382547	0.0536899	-0.277498	0.726116	0.174879	0.0428109	-0.400172	0.428868	-0.0922986	-1.1735	1.00793	0.421228	1.83191	0.365793	-0.360177	0.00847157	-0.383283
Vincristine	1.42766	0.632667	0.859125	0.0536899	1.11685	0.566395	0.522448	0.751707	1.01687	0.428868	0.230851	0.703533	3.23779	1.13729	-0.0453198	0.747232	2.01858	0.566483	-0.643552
Colchicine	-0.209741	-0.506761	0.0382547	-0.5394	-0.277498	-0.232211	-0.376121	-0.488861	-0.754433	-0.196687	-0.558557	-0.704244	-0.107007	0.421228	-0.983934	0.365793	0.920692	-0.421197	-0.44112
Trichostatin	-0.583261	-0.126951	-0.577398	-0.242855	-0.675884	-0.07249	-0.513768	-0.666086	-0.400172	-0.822241	-0.785889	0.703533	-1.22194	-0.294832	-0.983934	-0.778525	-0.543159	0.00847157	-0.217
Fumagillin	0.0177015	-0.88657	0.243472	-0.5394	-0.0783051	0.726116	-0.224887	0.220035	0.662611	-0.196687	0.521766	1.17279	-0.107007	-1.01089	-0.0453198	-0.524232	-0.177196	1.26958	-1.14963
Staurosporine	0.0484353	0.632667	-0.577398	-0.242855	-0.277498	-0.711375	-0.515547	-0.134413	0.30835	-0.509464	-0.0815267	1.17279	2.68033	2.56941	-0.983934	1.7644	4.58032	0.4493	-0.347134
ErythromycinA	1.07737	-0.506761	1.47478	0.64678	1.31605	0.0872312	0.757568	2.34672	3.14244	1.3672	2.05184	2.11131	-0.107007	-1.01089	0.893294	0.238646	-0.543159	0.0140517	0.252931
Streptomycin	0.491119	1.7721	1.26956	2.7226	2.31201	0.406674	2.20918	1.81505	2.07965	1.3672	2.22121	0.703533	-0.107007	-1.01089	0.893294	-0.778525	-0.543159	-2.63092	1.87238
PenicillinG	-0.460041	-0.126951	-0.37218	-0.242855	-0.675884	-0.391932	-0.339319	-0.311637	-0.0459111	-0.509464	-0.0283469	0.703533	-0.107007	-0.294832	-0.0453198	-0.651378	-0.177196	-0.237053	0.346917
ZaragozicAcidA	0.91115	-0.88657	1.67999	0.64678	1.31605	2.00389	1.05402	0.928931	0.662611	1.05442	0.708003	-0.704244	-0.107007	-0.294832	-0.0453198	-0.651378	-0.177196	0.44372	-1.09902
TalaromycinB	-0.860578	-0.88657	-0.37218	-0.242855	-0.675884	-0.711375	-0.623508	-0.134413	-0.0459111	-0.196687	1.09467	0.234274	-0.664473	-1.01089	-0.983934	-0.142793	0.188767	0.90687	-0.643552
Spongistatin1	2.96266	-0.88657	3.11652	1.23987	2.7104	0.726116	1.86161	3.41007	2.78818	3.55664	1.39442	-1.64276	2.12286	-1.01089	-0.983934	4.05304	3.84839	-0.108711	-0.93997
Radicicol	-0.343113	-0.88657	0.0382547	-0.242855	-0.277498	-1.03082	-0.24016	-0.311637	0.30835	-0.822241	-0.128297	1.64205	-0.107007	-0.294832	-0.983934	0.874378	0.920692	0.488361	0.187864
SalicylihalamideA	-0.0554103	-0.506761	-0.166963	0.0536899	-0.476691	-0.07249	-0.245271	-0.311637	-0.400172	-0.196687	-0.315391	-0.234985	-0.664473	-0.294832	-0.983934	0.492939	0.188767	1.21936	-0.867673
BrevetoxinB	1.69749	-0.88657	1.67999	-0.5394	1.31605	-0.551654	0.369109	3.23284	3.4967	2.61831	2.20836	0.703533	3.79526	-1.01089	-0.983934	4.94306	6.04417	0.599964	-1.36652
RifamycinB	1.16156	-0.506761	1.67999	0.943325	1.31605	-0.07249	1.10514	0.751707	0.662611	0.741645	0.364348	-0.234985	2.12286	-1.01089	0.893294	1.63726	0.432742	0.678085	-0.968889
Quinine	-0.498418	-0.126951	-0.782615	-0.5394	-0.675884	-0.391932	-0.759469	-0.134413	-0.0459111	-0.196687	0.420783	0.234274	0.45046	0.421228	-0.0453198	-0.269939	0.188767	0.265157	0.404755
MycobactinS	1.43954	1.01248	0.859125	0.64678	0.718467	3.44138	0.859795	-0.134413	-0.754433	0.428868	-0.582148	-1.64276	-0.107007	-0.294832	0.893294	-0.651378	-0.543159	1.91687	-1.76416
Telomestatin	0.494696	2.1519	0.243472	-0.835945	1.51524	-1.03082	0.767791	-0.666086	-0.577302	-0.665853	-0.998601	0.234274	3.23779	4.00153	-0.983934	2.52728	5.31225	0.549743	-0.086865
DuocarmycinA	0.213809	0.252858	0.44869	0.0536899	0.519274	-0.07249	0.195324	-0.488861	-0.400172	-0.509464	-0.703221	0.234274	1.00793	1.13729	-0.0453198	-0.0156465	0.554729	0.599964	-0.332675
Bleomycin	3.70025	5.57019	3.11652	5.09496	4.50314	4.71915	5.18396	2.52395	1.54826	3.08747	0.566896	-2.58128	1.56539	1.85335	3.70914	-0.778525	-0.543159	-1.5986	-0.838754
BrefeldinA	-0.667948	-0.88657	-0.37218	-0.242855	-0.675884	-1.03082	-0.542749	0.0428109	-0.0459111	0.116091	1.15693	-0.234985	-0.664473	-1.01089	-0.983934	0.492939	0.188767	-0.343076	0.730091
CytochalasinB	0.0987554	-0.506761	-0.166963	0.0536899	-0.476691	-0.711375	-0.245271	0.574483	-0.0459111	1.05442	1.00261	-1.64276	0.45046	-0.294832	-0.0453198	1.12867	0.188767	0.957091	-0.968889
EpothiloneA	0.152811	-0.506761	0.0382547	-0.242855	-0.0783051	-0.711375	-0.111355	0.397259	-0.0459111	0.741645	0.668213	-1.1735	-0.107007	-0.294832	-0.0453198	0.620085	-0.177196	0.521842	-1.08456
Apoptolidin	2.59903	-0.88657	3.11652	1.53642	2.7104	1.365	1.73894	3.58729	4.20522	2.61831	1.73228	1.64205	1.00793	-1.01089	2.77052	1.00152	-0.543159	0.633444	-0.45558
Lactacystin	-0.29829	-0.126951	0.243472	0.64678	-0.0783051	0.246952	0.338441	0.0428109	0.30835	-0.196687	0.548241	0.703533	-1.22194	-1.01089	-0.983934	-0.905671	-0.543159	-1.67672	1.61212
AVG-NP	0.673441	0.0946042	0.794139	0.607241	0.675309	0.513154	0.647092	0.76943	0.703941	0.736432	0.635008	-0.172417	0.320384	-0.330635	-0.0922505	0.471748	0.386997	-0.109827	-0.194829
ChemBridge1	-0.35992	0.632667	-0.782615	-0.5394	-0.476691	0.0872312	-0.408833	-0.84331	-0.754433	-0.822241	-1.22819	0.234274	-0.107007	1.13729	0.893294	-0.778525	-0.543159	0.488361	-0.332675
ChemBridge2	-0.799056	0.632667	-0.987833	-0.5394	-0.675884	-0.391932	-0.359764	-0.84331	-0.754433	-0.822241	-1.22819	0.234274	-0.664473	0.421228	-0.0453198	-0.905671	-0.543159	-0.449098	0.383066
ChemBridge3	0.062846	1.01248	-0.37218	-0.5394	-0.0783051	-0.07249	0.031762	-0.84331	-0.754433	-0.822241	-1.22819	0.234274	-0.107007	1.13729	0.893294	-0.778525	-0.543159	0.91803	-0.491728
ChemBridge4	-0.252138	0.632667	-0.577398	-0.5394	-0.277498	-0.07249	-0.313763	-0.84331	-0.754433	-0.822241	-1.22819	0.234274	0.45046	1.13729	0.893294	-0.269939	-0.299184	0.4493	-0.253148
ChemBridge5	-0.386987	1.01248	-0.577398	-0.835945	-0.277498	-0.391932	-0.152245	-0.84331	-0.754433	-0.822241	-1.22819	0.234274	-0.107007	0.421228	0.893294	-0.778525	-0.543159	0.259577	0.130026
ChemBridge6	-0.386987	1.01248	-0.577398	-0.835945	-0.277498	-0.391932	-0.152245	-0.84331	-0.754433	-0.822241	-1.22819	0.234274	-0.107007	0.421228	0.893294	-0.778525	-0.543159	0.270737	0.122796
ChemBridge7	-0.186936	1.01248	-0.166963	-0.242855	0.120888	-0.07249	0.317995	-0.84331	-0.754433	-0.822241	-1.22819	0.234274	-0.107007	1.13729	0.893294	-0.778525	-0.543159	0.226096	-0.325445
ChemBridge8	-0.240745	1.01248	-0.37218	-0.5394	-0.0783051	-0.07249	0.031762	-0.84331	-0.754433	-0.822241	-1.22819	0.234274	-0.107007	1.13729	0.893294	-0.778525	-0.543159	0.533002	-0.274837
ChemBridge9	-0.271455	0.252858	-0.577398	-0.242855	-0.476691	-0.232211	-0.364876	-0.84331	-0.754433	-0.822241	-1.22819	0.234274	0.45046	1.85335	1.83191	-0.778525	-0.543159	1.05195	-1.01227
ChemBridge10	0.0321352	0.252858	-0.577398	-0.242855	-0.476691	-0.232211	-0.364876	-0.84331	-0.754433	-0.822241	-1.22819	0.234274	0.45046	1.85335	1.83191	-0.778525	-0.543159	1.4035	-1.25085
AVG-ChemBridge	-0.278924	0.74661	-0.556876	-0.509746	-0.297417	-0.184295	-0.173508	-0.84331	-0.754433	-0.822241	-1.22819	0.234274	0.00448653	1.06568	0.987156	-0.740381	-0.518761	0.515146	-0.330506
ChemDiv1	0.00841242	0.632667	-1.19305	-0.5394	-0.476691	-0.711375	-0.816716	-0.666086	-0.577302	-0.665853	-0.93499	0.234274	0.45046	1.13729	0.893294	-0.397086	-0.299184	0.694825	-0.788146
ChemDiv2	0.00979769	0.632667	0.0382547	-0.5394	0.519274	0.246952	-0.0909094	-0.666086	-0.577302	-0.665853	-0.935221	0.234274	0.45046	0.421228	0.893294	-0.397086	-0.299184	0.226096	-0.130243
ChemDiv3	-0.0190237	1.01248	-0.37218	-0.242855	0.120888	-0.07249	-0.236071	-0.666086	-0.577302	-0.665853	-0.930334	0.234274	0.45046	1.13729	0.893294	-0.397086	-0.299184	-0.00268865	-0.108554
ChemDiv4	0.00979769	0.632667	0.0382547	-0.5394	0.519274	0.246952	-0.0909094	-0.666086	-0.577302	-0.665853	-0.935221	0.234274	0.45046	0.421228	0.893294	-0.397086	-0.299184	0.248416	-0.137473
ChemDiv5	0.0984476	1.01248	-0.166963	0.0536899	0.320081	0.406674	-0.0295737	-0.666086	-0.577302	-0.665853	-0.949297	0.234274	0.45046	1.13729	0.893294	-0.397086	-0.299184	0.0363721	0.0288103
ChemDiv6	0.0368798	1.01248	-0.37218	0.0536899	0.120888	0.406674	-0.121577	-0.666086	-0.577302	-0.665853	-0.93967	0.234274	0.45046	1.13729	0.893294	-0.397086	-0.299184	0.287477	0.0288103
ChemDiv7	-0.223575	1.01248	-0.782615	-0.242855	-0.277498	-0.391932	-0.282072	-0.666086	-0.577302	-0.665853	-0.890334	0.234274	0.45046	1.13729	0.893294	-0.397086	-0.299184	-0.0752301	-0.0940947
ChemDiv8	-0.164277	0.632667	-0.782615	-0.5394	-0.277498	-0.711375	-0.507992	-0.666086	-0.577302	-0.665853	-0.902994	0.234274	1.00793	1.13729	0.893294	0.1115	-0.0552085	0.187035	0.195093
ChemDiv9	-0.0363054	1.39229	-0.782615	-0.242855	-0.0783051	-0.232211	-0.293317	-0.666086	-0.577302	-0.665853	-0.927325	0.234274	1.00793	1.85335	1.83191	-0.397086	-0.360177	0.203776	-0.390512
ChemDiv10	-0.00944223	1.01248	-0.577398	0.0536899	0.120888	0.246952	-0.21767	-0.666086	-0.577302	-0.665853	-0.931977	0.234274	0.45046	1.13729	0.893294	-0.397086	-0.299184	0.43256	-0.20254
AVG-ChemDiv	-0.0289288	0.898534	-0.495311	-0.27251	0.06113	-0.0565179	-0.268681	-0.666086	-0.577302	-0.665853	-0.927736	0.234274	0.561953	1.06568	0.987156	-0.346227	-0.280885	0.223864	-0.159885
decarestrictineA1	-0.984021	-0.88657	-0.37218	-0.5394	-0.675884	-1.03082	-0.621464	-0.134413	-0.0459111	-0.196687	1.4706	0.234274	-0.664473	-1.01089	-0.983934	-0.142793	0.188767	-1.23589	2.21218
decarestrictineB	-0.922453	-0.88657	-0.166963	-0.5394	-0.476691	-1.03082	-0.447679	-0.134413	0.30835	-0.509464	1.26903	1.17279	-0.664473	-1.01089	-0.983934	-0.142793	0.188767	-1.58744	2.66042
decarestrictineC1	-0.976287	-0.88657	-0.37218	-0.242855	-0.675884	-1.03082	-0.542749	-0.311637	-0.400172	-0.196687	0.775586	-0.234985	-1.22194	-1.01089	-0.983934	-0.269939	-0.543159	-1.19125	2.22664
decarestrictineD	-0.914719	-0.88657	-0.166963	0.0536899	-0.476691	-1.03082	-0.336252	-0.134413	-0.400172	0.116091	1.24582	-0.704244	-1.22194	-1.01089	-0.983934	-0.269939	-0.543159	-1.84971	2.33509
diplodialideA	-1.04559	-0.88657	-0.577398	-0.835945	-0.875077	-1.03082	-0.781959	-0.666086	-0.400172	-0.822241	-0.494252	0.703533	-1.22194	-1.01089	-0.983934	-0.269939	-0.543159	-0.521639	1.08435
jasmineketolactone	-0.945426	-0.88657	-0.577398	-0.835945	-0.875077	-1.03082	-0.781959	-0.488861	-0.0459111	-0.822241	0.0562137	1.17279	-0.664473	-1.01089	-0.983934	0.1115	0.188767	-0.443518	1.05543
phoracantholideI	-1.03785	-0.88657	-0.577398	-0.835945	-0.875077	-1.03082	-0.781959	-0.666086	-0.754433	-0.509464	-0.502259	-0.234985	-1.22194	-1.01089	-0.983934	-0.269939	-0.543159	-0.398877	1.3157
phoracantholideJ	-1.04559	-0.88657	-0.577398	-0.835945	-0.875077	-1.03082	-0.781959	-0.666086	-0.754433	-0.509464	-0.494252	-0.234985	-1.22194	-1.01089	-0.983934	-0.269939	-0.543159	-0.521639	1.43137
pinolidoxin	-0.444611	-0.88657	0.0382547	-0.242855	-0.277498	-0.07249	-0.273894	-0.134413	-0.754433	0.428868	0.352645	-1.64276	-1.22194	-1.01089	-0.983934	-0.269939	-0.543159	0.030792	0.571038
pyrenolideA	-1.05336	-0.88657	-0.577398	-0.835945	-0.875077	-1.03082	-0.781959	-0.666086	-0.400172	-0.822241	-0.486024	0.703533	-1.22194	-1.01089	-0.983934	-0.269939	-0.543159	-0.594181	0.910834
ferrulactone1	-0.999221	-0.88657	-0.782615	-0.835945	-1.07427	-1.03082	-0.956766	-0.84331	-0.754433	-0.822241	-1.22819	0.234274	-1.22194	-1.01089	-0.983934	-0.142793	-0.543159	0.40466	0.679484
2,4,6,8-Tetramethyl-3,4-dihydroxydec-8(9)-enolide	-0.767957	-0.88657	-0.577398	-0.5394	-0.875077	-1.03082	-0.750269	-0.134413	0.30835	-0.509464	0.874868	1.17279	-1.22194	-1.01089	-0.983934	-0.142793	-0.543159	0.40466	0.426444
apicularenA	-0.0478066	-0.506761	0.0382547	0.0536899	-0.0783051	-0.07249	-0.151223	-0.134413	-0.0459111	-0.196687	-0.0165709	0.234274	-0.107007	-0.294832	-0.983934	0.492939	0.920692	0.4493	-0.498958
cladospolideA	-0.868351	-0.88657	-0.37218	-0.242855	-0.675884	-1.03082	-0.542749	-0.311637	-0.0459111	-0.509464	0.529371	0.703533	-1.22194	-1.01089	-0.983934	-0.0156465	-0.543159	-0.756004	1.61212
cladospolideB	-0.868351	-0.88657	-0.37218	-0.242855	-0.675884	-1.03082	-0.542749	-0.311637	-0.400172	-0.196687	0.529371	-0.234985	-1.22194	-1.01089	-0.983934	-0.0156465	-0.543159	-0.756004	1.61212
cladospolideD	-0.876085	-0.88657	-0.37218	-0.5394	-0.675884	-1.03082	-0.575462	-0.488861	-0.400172	-0.509464	-0.0460757	0.234274	-1.22194	-1.01089	-0.983934	-0.0156465	-0.543159	-0.638821	1.13495
curvularin	-0.621887	-0.88657	-0.166963	-0.242855	-0.476691	-1.03082	-0.368965	-0.666086	-0.754433	-0.509464	-0.770701	-0.234985	-0.664473	-0.294832	-0.983934	0.492939	0.188767	0.187035	0.296309
lyngbouilloside	0.495721	-0.88657	0.653907	-0.242855	0.320081	0.406674	-0.0714865	1.10616	1.72539	0.428868	1.29618	1.64205	-0.107007	-1.01089	-0.0453198	0.238646	-0.177196	1.17472	-1.04842
methynolide	0.0527027	-0.506761	0.243472	-0.242855	-0.0783051	-0.391932	-0.241182	0.928931	1.37113	0.428868	1.63168	1.17279	-0.664473	-1.01089	-0.0453198	-0.0156465	-0.543159	0.332118	-0.0796353
neomethymycin	0.0602832	-0.506761	0.243472	-0.242855	0.120888	-0.391932	-0.147134	1.10616	1.37113	0.741645	1.90447	0.703533	-0.664473	-1.01089	-0.0453198	-0.0156465	-0.543159	-0.326335	0.469822
pladienolideA	0.318445	-0.88657	0.44869	0.0536899	0.120888	0.566395	0.0603854	0.928931	1.01687	0.741645	1.26368	0.234274	-0.664473	-1.01089	-0.0453198	-0.0156465	-0.543159	0.968251	-0.817065
fluvirucinA1	-0.0974841	-0.126951	-0.166963	0.64678	-0.0783051	-0.551654	-0.0602416	0.751707	1.01687	0.428868	1.58007	0.703533	-0.664473	-1.01089	-0.0453198	0.238646	-0.543159	0.259577	-0.144703
hypothemycin	-0.290807	-0.88657	0.44869	0.0536899	0.120888	-0.871096	0.0603854	0.0428109	-0.0459111	0.116091	0.53911	-0.234985	-0.107007	-0.294832	-0.983934	0.874378	0.920692	-0.778324	0.896375
iriomoteolide3a	-0.0745501	-0.88657	0.0382547	0.0536899	-0.277498	-0.07249	-0.20847	0.574483	-0.400172	1.3672	1.23381	-2.58128	-0.664473	-1.01089	-0.983934	0.492939	0.188767	0.622284	-0.354364
AVG-MC_NP	-0.581469	-0.807443	-0.192615	-0.341704	-0.468392	-0.70472	-0.442823	-0.0605698	0.0131324	-0.118492	0.521424	0.195169	-0.873523	-0.921384	-0.788389	0.01614	-0.253438	-0.281927	0.832814
a	-0.964715	-0.506761	-0.782615	-0.835945	-1.07427	-0.871096	-0.75262	-0.488861	-0.400172	-0.509464	0.0878939	0.234274	-0.107007	-0.294832	-0.0453198	-0.524232	-0.177196	-0.564048	1.56874
b	-0.910741	-0.506761	-0.782615	-0.835945	-1.07427	-0.871096	-0.819374	-0.488861	-0.400172	-0.509464	0.00292709	0.234274	-0.107007	-0.294832	-0.0453198	-0.397086	-0.177196	-0.309595	1.27087
c	-0.726032	0.252858	-0.37218	0.350235	-0.277498	-0.551654	1.12355	-0.311637	-0.400172	-0.196687	0.284318	-0.234985	-0.107007	-0.294832	-0.983934	-0.0156465	0.920692	-1.31402	1.36992
d	-0.567741	-0.126951	-0.987833	-0.5394	-0.875077	-0.871096	-1.01289	-0.134413	-0.400172	0.116091	0.517737	-0.704244	1.00793	0.421228	-0.0453198	0.620085	0.554729	1.05865	-0.147594
e	-0.518059	0.252858	-0.166963	0.0536899	-0.476691	-0.551654	1.2411	-0.134413	-0.754433	0.428868	0.447142	-1.64276	-0.107007	-0.294832	-0.0453198	-0.269939	-0.177196	-1.14326	0.383789
f	-0.906774	-0.126951	-0.987833	0.0536899	-0.875077	-0.871096	-0.350564	-0.311637	-0.754433	0.116091	0.609765	-1.1735	-0.107007	-0.294832	-0.983934	0.238646	0.920692	-0.362048	0.895652
g	-0.40615	-0.126951	-0.577398	-0.5394	-0.875077	-0.871096	-0.436127	-0.311637	-0.400172	-0.196687	-0.0765795	-0.234985	1.00793	0.421228	0.893294	0.747232	-0.0552085	0.157461	-0.132412
h	-0.460124	-0.126951	-0.577398	-0.5394	-0.875077	-0.871096	-0.372134	-0.311637	-0.400172	-0.196687	-0.0282699	-0.234985	1.00793	0.421228	0.893294	0.620085	-0.0552085	-0.0975505	0.104722
i	-0.179026	0.252858	-0.166963	-0.5394	-0.476691	-0.551654	-1.06461	0.0428109	-0.400172	0.428868	0.4131	-1.1735	1.00793	0.421228	1.83191	0.1115	-0.360177	0.0932893	-0.703559
j	-0.745183	-0.126951	-0.577398	0.0536899	-0.875077	-0.871096	0.216485	-0.488861	-0.400172	-0.509464	-0.200573	0.234274	-0.107007	-0.294832	-0.0453198	0.365793	-0.177196	-1.07965	0.99759
k	-0.799157	-0.126951	-0.577398	0.0536899	-0.875077	-0.871096	0.380762	-0.488861	-0.400172	-0.509464	-0.142042	0.234274	-0.107007	-0.294832	-0.0453198	0.238646	-0.177196	-1.3341	1.23762
AVG-cpd	-0.653064	-0.0924231	-0.596054	-0.296772	-0.784535	-0.783975	-0.167857	-0.311637	-0.464583	-0.139818	0.174129	-0.405625	0.298423	-0.0344468	0.125337	0.157735	0.0945036	-0.444989	0.622303

## Sheet: Loadings
	PC1	PC2	PC3	PC4	PC5	PC6	PC7	PC8	PC9	PC10	PC11	PC12	PC13	PC14	PC15	PC16	PC17	PC18	PC19
MW	-0.329233	0.124056	-0.0285203	0.0599914	-0.00557488	0.127233	-0.123046	0.0831527	-0.179004	0.0668267	-0.0477778	-0.170304	-0.0784252	-0.0872769	0.0509129	0.596288	0.627546	0.00134955	-0.00017603
N	-0.130529	0.353524	0.241567	-0.28635	0.0734152	0.103213	-0.124811	-0.657423	-0.386369	-0.037603	-0.0127146	0.0677837	0.0727471	-0.116145	0.0582237	0.102996	-0.256076	-0.000336405	-0.000513406
O	-0.331087	-0.0608599	0.0629948	0.0202656	-0.0362693	0.0887551	-0.00733638	0.404218	-0.0659051	0.0836786	0.160278	0.220601	-0.227606	-0.0593536	-0.0293178	0.421538	-0.624562	0.000450453	0.00106732
HBD	-0.280585	0.0444871	0.299017	-0.082312	0.0161182	0.0774641	-0.0719759	-0.0738976	0.644954	-0.0345154	0.277381	-0.219838	0.332253	0.111334	0.365972	0.0707628	-0.0452436	-0.000567116	-0.000243487
HBA	-0.324667	0.0616958	0.0970985	-0.0983014	-0.0803496	0.0820058	0.0875805	0.240005	-0.179582	0.243507	-0.108372	0.422357	0.0562374	-0.193494	0.486688	-0.44437	0.191395	-0.000438988	-8.58191e-05
RotB	-0.222101	0.233386	0.192661	0.280843	0.0600852	0.264473	0.50103	0.0251441	-0.103524	-0.105483	-0.00488502	-0.486731	-0.341486	0.0424344	-0.0233845	-0.269345	-0.0686362	5.50344e-05	0.000217162
tPSA	-0.307171	0.0674873	0.228442	-0.120947	0.0392176	0.115372	-0.0636239	0.016707	0.0967047	-0.0358743	0.305664	0.324318	-0.00841464	0.186144	-0.678884	-0.223959	0.245124	0.00135042	0.000567575
nStereo	-0.312846	-0.193309	-0.0678119	0.109054	-0.0857129	-0.0915028	-0.0141875	-0.0936583	-0.0397739	0.0959799	-0.280189	-0.107816	0.220568	0.0693495	-0.133606	-0.0448411	-0.0918997	-0.773415	-0.206671
R	-0.270328	-0.242679	-0.0973417	0.0304941	-0.355414	0.0740361	-0.000670671	-0.119707	-0.0356685	0.0852549	-0.25732	-0.129809	0.20939	0.0656985	-0.139431	-0.0442748	-0.0894039	0.271681	0.684488
S	-0.313331	-0.126429	-0.0337457	0.165538	0.163295	-0.227047	-0.0247469	-0.0588572	-0.0398563	0.0910619	-0.271753	-0.0764758	0.209539	0.0676248	-0.109896	-0.0418651	-0.0859122	0.566095	-0.54339
nStMW	-0.185188	-0.396129	-0.0451504	0.101646	-0.0546874	-0.273217	0.200086	-0.488858	0.224788	0.0663492	0.16197	0.190155	-0.507391	-0.206057	0.0959531	0.0457936	0.105921	0.00201191	0.00226443
RSdelta	0.111399	-0.13259	-0.0783123	-0.20743	-0.714826	0.437768	0.035745	-0.0700898	0.0146067	-0.0241818	0.0679509	-0.0560251	-0.0410495	-0.016898	-0.0199177	0.00356647	0.00926261	0.086849	-0.439864
Rings	-0.191152	0.157117	-0.375349	-0.295418	-0.0607956	-0.296249	0.205379	0.120515	-0.0121894	-0.206258	0.280687	-0.214053	0.2187	-0.564647	-0.149943	-0.07401	-0.0232812	0.000493729	0.000454104
RngAr	0.0149327	0.45171	-0.132329	-0.319465	-0.0525139	-0.0910737	0.0489478	0.00848595	0.42218	0.469279	-0.401239	-0.0283205	-0.275389	0.011238	-0.152213	0.0308148	-0.0480321	0.000660237	0.000533251
RngSys	-0.121422	0.335423	-0.0267398	0.0787723	-0.442344	-0.554415	-0.0822599	0.0414448	-0.136805	-0.227415	0.12177	0.0269752	-0.130204	0.475184	0.157759	-0.0239721	0.00968082	-0.000634793	-0.00048055
RngLg	-0.217872	-0.131446	-0.319717	-0.221956	0.191094	0.151747	-0.613343	0.0323022	-0.0208514	-0.134608	0.033734	-0.267428	-0.376776	0.0834354	0.111891	-0.302342	-0.0541371	-0.000187805	0.000765637
RRSys	-0.101213	-0.117034	-0.410454	-0.393386	0.261499	0.149217	0.473228	-0.0616353	-0.0643861	-0.0964504	0.0269724	0.133381	0.0791801	0.507587	0.135592	0.138912	0.0296659	-0.00079234	-0.00103922
ALOGPs	0.0137168	0.217014	-0.436054	0.415537	0.00490928	0.147218	-0.0733154	-0.174815	-0.0638503	0.528807	0.459567	0.00527573	0.146641	0.0849144	0.0166008	-0.0677596	-0.0611949	0.00104473	-2.86618e-05
ALOGpS	0.109062	-0.291663	0.324636	-0.371817	0.00759059	-0.259241	0.0481655	0.10648	-0.291728	0.512753	0.269506	-0.372329	-0.0250602	0.126777	-0.0153105	-0.0287694	0.037872	0.000939589	-0.000221251

## Sheet: Scores
	PC1	PC2	PC3	PC4	PC5	PC6	PC7	PC8	PC9	PC10	PC11	PC12	PC13	PC14	PC15	PC16	PC17	PC18	PC19
Lipitor	0.164034	3.00048	-0.814099	0.675054	-2.04291	0.29909	0.396477	0.191137	1.04768	-0.127113	-0.0507215	-0.0790072	-0.350166	0.276045	0.0314977	0.13884	0.143295	0.00203377	-0.00411811
Nexium	1.73151	0.897557	0.128838	-0.932708	-0.514914	0.219392	0.0702703	0.121537	-0.000783301	0.379798	-0.414572	-0.162128	-0.17573	-0.0646098	-0.122709	-0.0318657	-0.00794189	0.00453926	-0.000908974
Prevacid	1.6126	1.1921	-0.0896246	-0.57788	-0.116264	0.10342	0.0301606	0.0971912	-0.0897762	0.680591	-0.351784	0.00556878	-0.00599706	-0.115896	0.169383	-0.252667	0.186498	-0.000182493	0.00074409
Flonase	-0.985992	-1.60309	-2.03598	0.881675	1.67928	-0.146609	0.714363	-0.368896	-0.14901	-0.190747	-0.157037	0.292822	0.24698	-0.020638	0.22388	-0.108862	0.295488	-0.00157532	0.00219525
Serevent	1.09394	1.59513	0.171596	1.51934	-0.11687	1.182	0.645333	0.315989	0.789628	-0.240856	0.00784876	-0.492414	-0.175547	0.198524	0.148989	-0.135468	-0.0400846	-0.000780606	0.00151199
Singulair	0.587711	3.85758	-2.79785	1.84154	-1.43692	0.486907	0.0848532	0.0240021	1.10741	-0.318025	0.303233	-0.146773	-0.260862	0.115948	-0.0844326	0.0790215	0.199158	0.00545316	8.37245e-05
Effexor	2.44947	0.0662473	0.278909	0.554641	-0.168573	-0.0254857	0.017142	0.21773	-0.142327	-0.0203052	0.0667415	-0.317338	0.225308	0.185958	0.0827741	0.0564527	-0.00591278	-0.00109224	0.000407074
Plavix	2.302	0.905128	-0.99614	0.6656	0.340109	-0.111097	-0.0988453	0.00244989	0.16089	-0.0379141	-0.217376	-0.101627	0.236263	0.011433	-0.0462888	-0.0888645	0.231799	0.00352304	-0.000399393
Zocor	0.237422	-1.09873	-1.13953	1.70283	-0.861073	0.218405	0.306233	-0.554213	-0.0167656	-0.0378869	0.363352	0.0278831	0.00593208	-0.142117	-0.0980351	-0.0189797	0.0207571	0.000833652	-0.00289076
Norvasc	1.18979	0.875699	0.604308	0.849566	-0.152141	0.826588	0.239131	0.449372	-0.0539578	-0.636903	-0.128361	0.279361	0.00784155	-0.0412043	0.124649	-0.00216695	0.0441895	-0.00150345	0.00113021
Lexapro	2.03685	1.12069	-0.835715	0.600857	0.355175	0.0530952	-0.0580773	-0.106565	0.0242594	-0.192988	-0.316939	0.0751172	0.163679	-0.102043	0.0166406	-0.0917444	0.0594853	0.00314124	-0.000295428
Seroquel	1.65153	1.54554	-0.933402	-0.776784	0.20926	0.380354	-0.216443	0.179006	0.0285134	-0.0653578	-0.217907	-0.477616	-0.135745	-0.127832	0.102885	-0.153181	-0.0138882	-0.00109705	0.000756968
Protonix	1.28186	1.12817	0.306375	-0.76821	-0.120732	0.158328	0.2237	0.426055	-0.21554	0.617243	-0.387544	-0.00611865	-0.263959	-0.141351	0.110303	-0.240394	0.0629531	1.84149e-05	0.00127394
Ambien	2.48378	1.45036	-0.631838	-0.320448	0.00330499	0.14324	-0.253266	-0.109333	0.0536249	0.178389	-0.44954	-0.0987946	0.13366	-0.0138322	-0.1745	0.110821	-0.0856972	-0.00113499	6.40286e-05
Actos	1.75004	1.52233	-0.397745	0.808405	-0.633842	-0.16187	0.0723656	0.103147	0.0905377	-0.519731	-0.189166	0.0110292	0.0111492	0.110101	0.136281	0.144023	-0.123761	-0.00173004	0.000693535
Zoloft	2.03239	1.13556	-1.83594	1.58628	0.71424	-0.177282	-0.426902	-0.617636	0.877879	-0.369609	-0.279636	0.321229	0.406338	-0.0779291	0.0425275	0.147801	-0.0158024	-0.00101787	0.00190645
Wellbutrin	2.84829	-0.253859	0.191684	0.880701	0.284073	0.669331	-0.120943	-0.167058	0.170627	0.262419	-0.145836	-0.12056	0.343062	0.0771511	-0.0243117	0.0754697	-0.0179835	-0.000845671	0.000603761
Avandia	1.54487	1.55084	0.111107	0.45343	-0.188796	-0.509986	0.040853	0.0443971	-0.258855	-0.200433	-0.0151013	0.0116095	0.0285703	0.173126	0.0283111	0.0118603	-0.062885	0.00347942	-0.000442539
Risperdal	1.60937	2.05853	-0.815769	-0.913285	-0.431368	-0.547994	-0.0876025	0.115717	-0.5625	0.116768	0.158472	-0.23311	0.142233	-0.219489	-0.0145256	-0.0401336	0.0876421	-0.000235556	8.19172e-05
Zyprexa	2.24439	1.19168	-0.683884	-1.45074	0.195377	-0.166143	-0.501641	-0.214775	-0.179585	0.284002	-0.15113	-0.536068	0.273815	-0.0682269	0.136484	-0.0778036	-0.00265764	-0.00130795	-0.000372149
Topamax	0.502454	-1.93275	0.181069	-0.896695	0.431637	0.185992	0.554062	0.548636	-0.713592	0.224262	0.452593	0.39021	-0.00395623	-0.0136905	0.116392	0.0201683	-0.0838485	-0.00577496	-0.000560342
Toprol	2.28014	-0.333292	1.0757	0.48986	0.302043	0.771494	0.336294	0.33026	0.0747826	0.124774	-0.227032	-0.475758	-0.014363	0.0855826	0.0729659	-0.0710383	-0.087692	-0.00101506	0.000988424
Zetia	0.889797	1.86756	-0.927685	0.935163	-0.880607	-1.35675	0.122875	0.0872732	0.572216	0.0753973	0.00331453	-0.00938813	-0.0623355	0.324047	0.0827095	0.053106	0.101629	-0.00261112	-0.0018983
Fosamax	2.0312	-1.34302	3.78153	-0.481888	0.460445	1.08639	0.0670384	1.39591	0.392759	0.136664	0.031555	0.1974	0.7378	-0.303461	-0.0582335	0.132527	-0.0218842	-0.00104179	0.000957603
Abilify	1.63139	2.16934	-1.19797	0.682468	-0.394462	0.139792	-0.254003	-0.0841202	-0.306148	-0.146594	0.580092	-0.328763	0.257595	0.0617034	0.191183	0.0613963	0.0488011	-0.00048007	1.32198e-05
Levaquin	1.3218	0.291778	0.393929	-1.63288	0.426504	-0.606381	-0.0650475	0.677659	-0.465434	-0.325577	-0.41189	0.0197796	0.0364829	-0.312959	0.232535	-0.0148116	0.0861239	0.00275301	-0.000135518
Lamictal	2.42783	0.977556	1.00405	-0.816659	-0.0450594	0.00953614	-0.514013	-0.494208	-0.279765	0.1685	-0.158362	0.156024	0.642227	0.147938	-0.00456646	-0.0794627	0.0584013	-0.00182256	-0.00118156
Celebrex	1.72902	2.27107	-0.514722	0.261296	-0.650417	-0.0473739	-0.329258	0.122083	0.102418	0.225597	-0.193647	0.708955	0.293605	0.0565001	0.226299	-0.119746	0.203173	-0.00106838	7.2307e-05
Benazepril	0.664733	0.94335	0.257594	0.238768	0.775211	-0.00123132	0.203983	0.485145	0.268982	-0.764086	-0.62454	-0.0533265	-0.397256	-0.136039	-0.0218327	-0.000368962	-0.018003	-0.00111154	0.00264549
Zyrtec	1.65417	1.34711	-0.0014188	0.469689	-0.627816	-0.289882	0.186065	0.289695	-0.209644	-0.124303	-0.0064	-0.267463	-0.0651566	0.195565	0.117404	0.0384667	0.0564948	-0.000835838	0.000527164
Coreg	0.860507	1.95545	-0.934349	-0.374706	0.0482576	0.614234	0.310214	0.332324	1.00147	0.0422622	-0.463337	-0.369208	-0.411284	-0.143148	0.0249971	-0.137505	-0.13922	-0.000475679	0.00231338
Valtrex	0.97102	0.345956	2.09338	-1.82531	0.996135	0.522322	0.356322	-0.131863	-0.468423	-0.0629124	-0.606407	0.055051	-0.070812	-0.0775551	0.035147	-0.213651	-0.0797541	0.00285158	-0.00053227
Adderall	3.23389	-1.07262	0.818599	0.0542865	0.270869	-0.0488338	-0.0429581	-0.282188	0.123926	0.420075	-0.121528	-0.398829	0.153706	0.13867	-0.0990508	-0.0318695	-0.0344645	-0.000311958	0.00112646
Aciphex	1.55598	1.13809	0.22515	-0.635106	-0.0607124	0.125857	0.271678	0.176854	-0.0684903	0.368449	-0.420725	-0.359962	-0.308683	-0.0361069	-0.113036	-0.130834	-0.0125322	-0.000145547	0.0011634
Cymbalta	2.13851	1.47637	-1.35795	0.863386	0.35389	0.102965	-0.0563109	-0.120839	0.745282	0.262207	-0.26665	-0.26748	-0.000614784	0.0776421	-0.0633882	-0.0564263	-0.128124	0.00394946	0.000419371
Crestor	0.566199	0.769632	1.12246	-0.201542	-1.10717	1.13254	0.341309	0.343626	0.0170319	0.0277231	-0.297893	0.253571	-0.218906	-0.0903941	0.0637028	-0.0294571	0.197	0.00164962	-0.00440728
Diovan	0.905649	2.54056	0.258506	0.290044	-0.150696	-0.0921385	0.117511	-0.392317	-0.168349	0.249987	-0.047354	0.0647386	-0.0819883	0.140802	-0.00340057	-0.111076	-0.0141181	0.00441915	-0.000393612
Tricor	2.19971	1.45451	-0.942708	1.64676	-0.175979	0.887466	-0.026375	0.613386	0.364679	-0.00969956	-0.109793	0.406681	0.048411	0.0921929	-0.132844	0.133872	-0.0721852	-0.000615216	0.0011794
Concerta	2.23185	-0.493984	0.491284	0.336829	-0.268292	-0.399959	0.130392	-0.0580396	0.0903734	-0.295138	-0.255623	-0.114796	-0.0354744	0.0419672	0.0237036	0.0393359	-0.0214649	-0.000367732	0.00104196
Imitrex	2.14359	0.474644	0.562333	-0.761839	0.590668	0.913304	0.172322	0.148025	0.0869973	-0.196229	-0.564765	-0.160756	0.199695	0.0511035	0.0999426	-0.00327731	-0.0288014	-0.00240577	-0.000259341
AVG-DRUG	1.54278	0.923125	-0.143252	0.148592	-0.0709526	0.160248	0.0696461	0.101632	0.0931119	-0.000408143	-0.153411	-0.0590493	0.0410018	0.00848225	0.0394909	-0.0255198	0.0195205	-0.00344365	-0.00208434
Forskolin	-0.524314	-2.49793	-0.176482	-0.0644936	1.06924	-0.564659	0.443817	-0.0650854	0.166359	0.0386037	0.00710164	0.182677	0.0289436	0.0379082	0.0648562	0.176407	0.088727	0.00362851	0.00193991
SQ26180	2.11727	-1.51083	2.4752	-0.976706	-0.195726	0.43062	0.147162	0.749051	-0.461414	-0.439778	-0.233609	0.220116	0.176411	-0.0609559	-0.123139	0.254173	-0.133859	0.00313861	-0.00103662
CephamycinC	-0.288667	-1.04034	2.7541	-1.45295	0.0236664	1.19665	0.741953	0.538387	-0.347323	-1.11867	-0.161264	0.15381	-0.101497	-0.0994484	-0.0815266	0.133794	-0.00163494	-0.0039037	-0.00281777
Thienamycin	1.49735	-2.07721	1.56192	-1.30071	-0.921659	0.752833	0.677038	-0.124589	-0.111826	-0.655095	-0.0754656	-0.282939	0.0302457	-0.0363309	-0.0557139	0.137398	0.0861942	0.000549356	-0.00151095
Artemisinin	0.438223	-3.10258	-1.66648	-0.63482	-0.0120969	-0.337322	0.881301	-0.835476	-0.177651	0.190845	0.457893	0.205118	-0.271924	-0.105357	0.070948	0.114713	-0.021936	0.00177823	-0.00165997
Coformycin	0.217619	-1.82604	1.8599	-2.16021	-1.60397	-0.318923	0.21288	-0.666183	0.180991	-0.385865	-0.15984	0.0226361	-0.225627	-0.325779	0.304716	-0.107012	-0.00536201	0.00193636	-0.000288989
Arglabin	1.00021	-2.2215	-1.5888	-0.0880777	1.83062	-1.13363	0.743207	-0.604712	-0.106779	-0.108475	0.430257	0.211932	0.0318343	0.0212933	0.123646	0.127348	0.0381881	0.0035556	-0.000583906
Mizoribine	0.657809	-1.75217	2.68736	-1.72929	-1.29683	-0.542027	0.390365	-0.147835	0.286206	-0.204591	-0.17278	0.123936	-0.25643	-0.0759139	0.0423082	0.0818586	-0.0279346	-0.00239374	0.00155035
Compactin	0.167707	-1.14728	-0.84876	1.73668	-0.0279873	-0.45792	0.341162	-0.48006	-0.0592165	0.0450845	0.329098	0.0251907	-0.0766257	-0.12867	-0.0630562	-0.0673447	-0.00365711	0.000742819	-0.00152622
Bestatin	1.22071	-1.03397	2.26595	-0.313461	0.591526	0.0667802	0.387153	0.075691	0.456098	-0.406409	-0.729884	-0.238951	-0.216363	-0.0362352	-0.0921137	0.100502	0.0695417	-0.00365722	-0.00130398
Plaunotol	3.01765	0.0779267	0.759207	2.58752	0.553549	2.03729	0.26408	0.192692	0.269667	0.409717	0.253143	-0.299321	0.721239	-0.310582	-0.143293	0.0878255	0.0048333	-6.33767e-05	0.000349153
Spergualin	0.603663	0.448693	4.28711	0.225726	1.10694	2.01542	0.681687	-0.569271	-0.0814642	-0.819913	-0.461098	-0.14112	0.408061	-0.663639	0.0882347	-0.194192	0.0291944	0.00235027	-0.00059437
Taxol	-4.11992	1.61561	-1.22816	0.667552	-0.297382	-1.44088	0.448046	1.20255	0.254209	0.0115483	-0.109158	0.0280033	-0.473847	-0.395405	-0.39806	0.0264151	0.0287553	-0.000527762	-0.00351718
Rapamycin	-4.04795	-1.66694	-2.52497	0.885504	-1.58683	1.76018	-1.7847	-0.0483534	-0.393073	-0.019267	-0.0154386	0.0054999	-0.295919	-0.154258	-0.0999276	-0.174787	0.112119	-0.00590806	0.000366445
AvermectinB1a	-5.80086	-1.19864	-2.41766	2.0959	2.10074	-2.7211	-0.636074	0.464691	-0.560372	0.0205514	-0.414848	-0.0322051	0.348142	-0.533217	-0.111358	-0.247041	-0.16258	-0.000131158	0.000332758
PseudomonicAcidA	-1.37217	-0.529732	1.06356	2.39542	1.08723	-0.503175	1.0177	0.388692	0.203476	-0.245185	-0.143558	0.013075	-0.329795	0.0219364	0.0269474	-0.174208	-0.053662	-0.000492132	0.000725379
Daptomycin	-11.6706	4.46864	5.13956	-1.75766	1.85531	2.40146	-1.05959	-0.537508	0.267611	-0.403958	0.850806	0.0836948	-0.78251	0.131374	0.09895	0.0832578	-0.0228115	1.33986e-05	0.00169613
MidecamycinA1	-4.13567	-1.53649	-0.0590656	1.54902	-2.24611	0.427163	0.0843499	0.300392	-0.848345	0.521657	-0.310178	0.0995752	-0.427798	0.0381261	-0.129826	-0.180445	-0.0982352	0.00379204	-0.00219545
EchinocandinB	-6.90549	0.511064	1.70577	0.0906824	1.93698	0.465362	-0.701402	-0.350213	0.457134	0.0343885	0.37179	-0.782285	0.215255	0.234217	0.104818	0.0166054	-0.138833	-0.00120517	-0.00124766
CalicheamicinG1	-8.45649	2.17829	0.462649	2.32387	0.0280434	-2.66143	0.622479	1.69331	-1.12355	-0.15591	-0.0158879	-0.0921665	0.140909	0.183039	0.337982	0.350632	0.324398	-0.00139044	0.00185817
Validamycin	-3.64283	-3.11775	3.31463	-0.789337	-1.5505	-1.86114	0.75156	0.124517	1.17681	-0.0138541	0.11252	0.0018747	0.184536	0.212474	0.348004	0.103672	-0.0376407	0.00143382	0.00482715
CyclosporinA	-4.7878	0.960079	0.922508	1.37788	3.12979	1.53757	-2.52587	-1.69526	-1.79022	0.216424	-0.367174	-0.139179	-0.403722	-0.0875304	-0.0836794	0.507258	0.0997152	0.00117433	0.00281806
FK506	-3.23031	-2.06189	-1.84448	0.280473	-2.98459	2.0903	-0.855146	-0.201655	-0.240786	-0.392369	-0.199356	-0.0658312	-0.259489	-0.301162	-0.202109	-0.031599	0.068024	0.00155011	-3.9226e-05
Lipstatin	0.353584	1.13523	-0.413148	4.19252	1.86991	1.30686	1.00118	-0.351315	-0.137951	0.0512323	0.165019	0.00612803	-0.059314	-0.0744626	-0.0750244	-0.174479	-0.107754	-0.00147216	6.08772e-05
Geldanamycin	-0.970536	-0.525315	-0.379172	0.480732	1.25145	0.871987	-0.889572	0.140992	0.257263	-0.152559	-0.341496	0.697546	-0.330489	-0.054332	-0.00998102	0.077993	-0.0495223	-0.000358336	-0.00415155
Actinonin	0.98796	-0.716004	2.06664	0.471309	0.677319	0.568403	0.436749	-0.163669	-0.309572	0.0738362	0.243287	-0.495647	0.158749	0.0928343	-0.0220912	0.164028	-0.0472828	-0.00249572	-0.00235701
Discodermolide	-2.41802	-1.026	0.999762	3.47274	2.55918	-0.717114	0.8383	-0.728959	0.496689	0.513387	-0.751788	0.0435179	0.101988	-0.0230492	-0.259265	0.0240301	-0.01974	0.00246452	0.000328871
Monensin	-3.69822	-1.48329	-0.897387	1.85468	-2.47557	-1.31574	0.619313	-0.397804	0.0897051	-0.50943	-0.332532	0.0719662	0.193511	-0.114143	-0.194256	0.0501641	-0.0794346	-0.00174083	-0.000947
CalyculinA	-5.47073	0.39279	1.51065	1.77633	0.503078	0.713553	1.19571	0.136056	-0.474133	1.21375	-0.0690834	-0.534265	0.0243068	0.0337046	-0.0984986	-0.100918	0.127921	-0.00393151	-0.00209924
AmphotericinB	-6.25183	-3.27936	0.434362	-0.946911	-1.86789	1.24413	-2.37815	0.518445	1.17453	-0.480187	-0.562064	0.0526087	-0.0129462	0.193012	0.276677	-0.224395	0.126339	0.00138645	0.00160036
Adriamycin	-1.91986	0.173042	0.0175971	-1.15937	1.47924	-1.15847	-0.0408695	1.20453	0.894825	0.660204	0.155989	0.214362	-0.226966	-0.140097	-0.0344087	-0.0702533	-0.0372594	0.000392495	0.00209474
GinkgolideB	-1.94972	-3.89986	-1.78906	-2.42944	-0.755776	0.138063	1.68478	-0.240966	-0.0404168	-0.212981	0.489743	0.268338	0.113537	0.0613742	-0.0134733	0.227621	-0.0262736	0.000788759	0.00294129
PhorbolMA	-1.6442	-0.483097	-2.12904	1.6587	0.564401	1.86429	1.42438	-0.116658	0.0779054	-0.357721	0.553927	-0.232312	0.118022	0.167143	0.0185821	-0.0946933	0.0628215	0.00355183	-0.00036995
Vancomycin	-11.3473	1.83129	0.0597775	-3.53637	0.419021	-0.137266	-1.34282	0.452283	1.50887	0.946983	0.330361	-0.530824	0.561025	-0.66729	-0.309964	0.1719	-0.119534	-0.000743002	-0.00134295
TrapoxinB	-1.04535	1.74366	-0.157302	0.267943	0.248757	-1.54604	-0.229144	-0.0694917	-0.318162	-0.741942	0.191553	-0.58668	-0.434576	0.150018	-0.098328	0.0170429	-0.0216997	0.0024973	-0.00176197
Vincristine	-3.13148	0.936614	-2.6028	-1.84849	-0.46022	0.405496	1.28041	0.0884266	-0.302832	0.0855164	0.222525	-0.31573	0.320767	-1.03568	-0.289984	0.262001	0.162185	0.00481069	0.00257145
Colchicine	0.902003	0.0094376	-0.685029	-0.47235	1.48028	0.413109	0.181033	0.69343	0.239153	-0.298688	-0.55638	0.268747	-0.266121	0.0266119	0.00440035	0.20905	-0.0805355	-0.000798783	0.00261251
Trichostatin	2.21388	-0.0573582	0.691507	0.515198	-0.117164	1.23425	-0.0320455	-0.0670296	0.163872	-0.0709971	-0.218075	0.0558987	0.246195	-0.016567	-0.029436	0.133885	-0.0677565	0.00359553	-0.00122049
Fumagillin	0.00410529	-0.530985	-0.977478	1.85383	-1.25714	1.02093	0.679661	-0.0818662	-0.138998	-0.222843	0.444944	0.188208	-0.0615855	-0.194901	-0.116113	-0.0742171	-0.0488579	-0.000961158	0.000915242
Staurosporine	-0.397043	0.609623	-4.40467	-4.18848	0.679465	1.03184	1.42113	-0.798394	0.64533	0.152145	-0.234334	-0.44952	0.0278824	0.346245	0.0844944	0.266954	-0.0548016	-0.00343076	-0.00115965
ErythromycinA	-3.86424	-2.65095	0.0559485	0.830886	-3.29659	0.0727273	-0.13829	-0.445581	-0.206847	0.676645	-0.353627	0.0766338	0.133471	0.0958182	-0.142204	0.0756233	-0.0450999	0.000317954	-0.00372536
Streptomycin	-4.69358	-2.01227	3.96401	-1.46798	-1.86356	-0.9484	0.546028	-1.16419	0.0891301	0.0946465	0.0639772	0.526853	0.60244	-0.0047387	0.294135	-0.315921	-0.018452	-0.00219913	-0.00119424
PenicillinG	1.34746	-0.406621	0.238464	-0.146226	-0.640983	-0.0374877	0.207434	-0.18404	-0.00717113	-0.2073	0.188931	-0.0835666	0.179109	-0.0493428	-0.164692	0.239066	-0.046794	-0.00233638	-0.00288774
ZaragozicAcidA	-3.05042	0.0382165	0.486402	2.03081	0.121725	0.511598	1.26046	0.92588	0.39663	0.25935	-0.102589	0.437864	-0.302774	-0.146835	-0.203465	-0.0667561	-0.0961537	-0.00246805	0.000180631
TalaromycinB	1.28877	-1.56945	-0.906952	1.18013	0.260125	0.4203	0.0646584	-0.703787	0.600392	-0.0472482	0.458617	0.594844	0.0521702	-0.118211	0.213803	-0.01169	-0.164879	-0.00558159	0.000970077
Spongistatin1	-8.90053	-2.92549	-3.22882	-0.860462	2.25048	0.693739	-0.0355104	1.28921	-0.433007	-0.160603	-0.722535	-0.0731343	0.392943	0.541947	0.0999595	0.0711183	0.123837	-0.00101975	-0.00173885
Radicicol	1.03901	-1.37189	-1.36088	-0.870259	-0.632168	1.40601	-0.382905	0.329147	0.257603	0.202812	0.548265	0.131672	0.0304179	0.210536	0.0695327	0.0438996	-0.00477198	0.00198835	-0.000547434
SalicylihalamideA	0.720922	-0.0324208	-0.871993	0.981105	0.945986	1.13959	-0.469657	-0.0293335	0.451944	0.1361	0.310055	0.0785802	0.0943785	0.166237	0.124395	0.0398684	-0.0152826	-0.0024531	-0.00120831
BrevetoxinB	-6.82235	-4.04199	-7.04648	-2.51741	0.79028	0.906256	0.625773	-0.308132	-0.884665	-1.02096	-0.499367	-0.34991	0.319831	0.481626	0.0149936	-0.1801	-0.170095	0.000288498	0.00216779
RifamycinB	-3.64612	-0.13007	-1.53752	0.0689301	-0.235424	-0.223269	-0.704351	1.10749	-0.0401256	-0.797262	1.36778	0.324738	0.342629	-0.509468	0.224814	-0.144612	-0.00633183	0.000872806	-0.00116058
Quinine	1.21619	-0.206709	-0.761718	-0.296082	-0.199722	-0.621784	0.383498	-0.580939	0.0817079	0.294044	-0.0372356	-0.376851	-0.0383495	-0.2235	-0.0765959	-0.00595669	0.00887995	-0.00565062	-0.000866769
MycobactinS	-2.35625	3.24402	0.679297	2.86699	1.14082	0.900508	0.996774	0.0116294	-0.631918	-0.212575	0.878949	-0.33745	-0.42653	0.156304	0.196938	-0.0597257	0.0160449	-0.000522478	-8.46221e-05
Telomestatin	-1.52532	2.57122	-4.43061	-6.10068	1.92601	1.21948	0.987604	-0.187908	-0.336433	1.02663	-0.152867	0.924249	-0.411496	0.16891	-0.0150126	-0.131704	-0.0314658	0.000926203	0.00103875
DuocarmycinA	-0.146005	1.44074	-0.833329	-0.929235	-0.0184103	0.437867	0.298409	0.559403	0.199503	0.421043	0.381755	0.341467	0.0756362	-0.384022	0.0097324	0.129486	-0.120686	0.00186348	0.00184694
Bleomycin	-11.6812	5.44366	5.20121	-0.779834	-0.103045	-1.08419	1.20238	-1.33106	-0.069634	-0.130734	-0.141269	0.296934	0.427116	0.432702	-0.0446969	-0.12493	-0.0731494	0.00320499	-0.00143871
BrefeldinA	1.05006	-2.40888	-0.156814	0.0973867	0.730302	-0.383219	-0.365682	-0.346685	0.263755	0.014218	0.13706	0.0553012	-0.221216	0.0134029	0.163413	0.00523359	0.0502393	0.00448827	-0.0053955
CytochalasinB	-0.831726	-0.536003	-1.65018	1.08361	1.48805	-1.08531	-0.866769	-0.548682	0.560048	-0.15125	0.0471668	0.109129	0.0627249	-0.120695	0.0476095	-0.021663	-0.00310955	-0.000500603	0.000860648
EpothiloneA	-0.507855	-0.421943	-0.972913	1.13984	0.931702	-0.654934	-0.81695	-0.173271	0.345196	-0.174989	-0.308422	0.623536	-0.0397163	-0.159308	0.0243674	0.0514381	0.0851919	-0.00446486	-0.00292977
Apoptolidin	-7.88651	-1.62695	-0.497345	1.70528	-4.06061	-0.411944	-0.25384	0.839024	-0.489462	0.585313	-0.151138	-0.285104	0.303253	0.577916	-0.0670676	-0.0315181	-0.115414	0.000535809	0.00169119
Lactacystin	0.411023	-1.99126	2.58456	-0.382455	-0.396444	0.446853	0.520985	0.0251291	0.070767	0.0657843	0.00802889	-0.229661	-0.0405228	-0.00362873	-0.100468	0.217427	0.0310663	0.0016862	0.00443149
AVG-NP	-2.21141	-0.551697	-0.0113872	0.0721565	0.10764	0.183117	0.171394	-0.0234689	0.0265434	-0.0369362	0.0180227	0.0183752	0.00464591	-0.0399711	-0.00481555	0.0249883	-0.00714901	0.00100212	-0.00583183
ChemBridge1	1.81509	2.23212	0.0409919	-0.0289404	-0.531953	-0.122591	-0.0381347	-0.119714	-0.142986	0.0872783	-0.154471	-0.0469343	-0.00378218	0.209681	-0.0929894	-0.0275369	-0.0480281	-0.000835845	-3.39419e-05
ChemBridge2	2.48704	0.948395	0.948637	-0.488075	-0.0697107	0.0726953	-0.131673	-0.176045	-0.273007	-0.0857543	-0.352783	0.0252644	0.3245	0.143321	-0.226544	-0.04784	-0.0563296	-0.00183608	-0.00065098
ChemBridge3	1.25042	2.55062	0.0157199	-0.00354857	-0.544868	0.15249	-0.252609	-0.161758	-0.385507	0.379207	0.132762	0.449103	0.0381002	0.118499	-0.152205	0.177145	0.0251827	0.000496505	0.000338366
ChemBridge4	1.41826	2.17618	-0.366455	-0.514389	-0.434999	-0.184546	-0.19958	0.100606	-0.239237	-0.0140788	0.0660425	-0.0810113	-0.0514374	0.0162517	-0.0563123	-0.107705	-0.0581873	-0.00053494	0.000543813
ChemBridge5	1.79139	1.74577	0.387776	-0.333312	-0.510519	-0.260762	-0.29749	-0.145662	-0.875665	-0.0355596	0.15828	0.344335	0.207015	0.142919	-0.157262	0.0191382	-0.0744671	-0.000790492	-0.000390202
ChemBridge6	1.79044	1.75086	0.380169	-0.325438	-0.510546	-0.256698	-0.298705	-0.148475	-0.873386	-0.0353991	0.16018	0.348111	0.208732	0.1425	-0.156943	0.0187483	-0.0754578	-0.000789441	-0.000388276
ChemBridge7	1.03631	2.35629	0.563641	-0.440133	-0.552763	0.0684719	-0.187549	0.0666328	-0.170943	0.124343	0.0529645	0.585159	0.0154767	0.138824	-0.174449	0.0219384	-0.11254	-0.000187632	0.000654601
ChemBridge8	1.36784	2.3646	0.265757	-0.265405	-0.543441	-0.000127857	-0.176506	-0.0951008	-0.371085	0.26573	0.0271558	0.416224	-0.00107545	0.139457	-0.177322	0.0183555	-0.130883	-0.000109096	0.000353678
ChemBridge9	1.46332	3.08267	-0.795523	0.136042	-1.06958	-0.681219	-0.18972	0.131223	0.532935	0.0972967	0.0390386	0.203637	0.0282388	0.363012	-0.0571035	0.107037	-0.096568	-0.000522006	0.000560204
ChemBridge10	1.34317	3.26584	-1.03461	0.388713	-1.07136	-0.529305	-0.263854	0.0694284	0.526901	0.179366	0.120872	0.243751	0.0620501	0.336123	-0.0323448	0.269112	0.0611882	2.30151e-05	0.000550463
AVG-ChemBridge	1.57509	2.25482	0.0420344	-0.185599	-0.586584	-0.175317	-0.207842	-0.0531976	-0.228597	0.0994592	0.0257499	0.248053	0.0800977	0.178089	-0.128792	0.0423299	-0.0571405	-0.000503341	0.000153559
ChemDiv1	1.66939	2.06419	-0.956602	-0.201138	-0.551376	-0.413505	-0.442907	-0.492372	0.000828753	-0.0787442	-0.298408	0.0440452	0.32862	-0.141269	0.20226	0.196552	0.32656	-0.00110429	-0.000151601
ChemDiv2	0.556804	1.71075	0.0802712	-0.300742	-0.548918	-0.05473	0.0984644	0.430625	-0.757993	-0.103143	0.262552	0.277558	-0.109707	-0.192565	0.225745	-0.16185	-0.050537	-0.000306512	0.00115876
ChemDiv3	0.823591	2.0357	0.113099	-0.808773	-0.533451	-0.274566	-0.0946064	-0.0725847	-0.273411	0.00480726	-0.111866	0.0630407	-0.0362562	-0.151413	0.170037	0.042984	-0.0342298	-0.000600239	0.000746751
ChemDiv4	0.555987	1.71801	0.0683038	-0.288713	-0.548896	-0.0491932	0.0965165	0.426064	-0.756352	-0.0976944	0.269048	0.281386	-0.106524	-0.192134	0.22623	-0.162918	-0.0521396	-0.000295013	0.0011604
ChemDiv5	0.419969	2.16563	0.39777	-0.769112	-0.51334	-0.076447	0.112746	0.0780771	-0.234228	0.101699	0.0879412	-0.113799	-0.136763	-0.0954443	0.216564	-0.0534776	-0.0394117	-0.000157364	0.000997334
ChemDiv6	0.600097	2.20223	0.237438	-0.641318	-0.492531	-0.0945442	0.0934781	-0.105853	-0.196808	0.168346	0.169428	-0.258141	-0.0654396	-0.0372231	0.188244	-0.0810143	-0.0267318	-8.08666e-05	0.000775994
ChemDiv7	1.23208	1.89474	0.0229175	-0.911405	-0.50855	-0.486341	-0.244974	-0.3631	-0.101232	-0.134475	-0.160235	-0.0197689	0.127336	-0.0657501	0.0140414	0.0304697	0.041822	-0.000935179	0.000374935
ChemDiv8	1.28256	1.63513	-0.769386	-1.20604	-0.43962	-0.737729	-0.421078	-0.0402719	-0.284754	0.0196934	0.0712583	-0.241332	0.0932404	-0.20672	0.053527	-0.0458166	0.115815	-0.00035946	0.000733295
ChemDiv9	0.799848	2.99555	-0.364797	-1.05371	-0.990043	-0.997398	-0.215168	-0.491265	-0.104884	-0.103266	-0.172681	-0.0383681	-0.0337665	-0.057386	0.0992376	-0.015399	0.0097639	-0.000786326	0.000371378
ChemDiv10	0.727324	2.25822	0.0357998	-0.536704	-0.499777	-0.0958933	0.0080273	-0.254443	-0.106718	0.124661	0.112347	-0.162231	0.0629777	-0.0651301	0.27029	-0.136272	0.0432997	-0.000436511	0.000538675
AVG-ChemDiv	0.869607	2.07138	-0.112159	-0.676917	-0.564755	-0.332522	-0.10367	-0.0926749	-0.279428	-0.0123956	0.0191313	-0.0145262	0.016183	-0.115653	0.169548	-0.0390466	0.0349892	-0.00052966	0.000650656
decarestrictineA1	1.69449	-3.12072	0.790685	-0.806699	0.227028	-0.862018	0.311619	-0.206087	-0.147213	0.338466	0.224272	-0.163237	-0.508328	-0.0542702	0.0625205	0.0628091	0.0751066	-0.00439483	0.0012863
decarestrictineB	1.67721	-3.40242	1.06937	-1.40768	-0.627835	-0.405621	0.357818	0.046726	-0.331253	0.413933	0.267267	-0.272842	-0.538024	-0.0230873	-0.0251014	0.0579496	0.0882278	-0.000473467	0.00242072
decarestrictineC1	2.02532	-2.62837	1.5482	-0.351289	0.560084	-0.812425	-0.250213	0.168084	-0.0406576	0.483577	0.176528	-0.193754	-0.277793	0.0500949	0.10477	0.0318316	0.0477476	-0.00127184	6.25479e-05
decarestrictineD	1.43529	-2.96754	2.02671	-0.508043	0.893574	-1.2728	-0.155922	0.179237	0.193015	0.332864	-0.0417366	-0.0485854	-0.434851	-0.0339483	0.152766	0.0846702	0.0868966	0.000406516	-0.0030014
diplodialideA	2.95435	-1.67093	0.647667	-0.0195632	-0.106083	0.394046	-0.504047	0.456001	-0.328712	0.00881483	0.0529253	-0.0342218	0.0908746	0.0860755	-0.0420466	-0.0233212	-0.0590943	0.0039277	-0.000532606
jasmineketolactone	2.4562	-2.08265	-0.135796	-0.521118	-0.382804	0.489348	-0.171723	0.122402	-0.296782	-0.117276	0.24974	-0.154094	-0.0530065	0.081851	-0.0072255	-0.0201726	0.000830309	0.00155325	-0.00388208
phoracantholideI	2.87461	-1.54064	0.769858	0.174202	0.736623	-0.149923	-0.545196	0.555134	-0.423882	0.216216	0.113282	-0.0527233	0.136593	0.141564	-0.0109231	-0.0336509	-0.0560878	0.00390349	0.000438071
phoracantholideJ	2.8864	-1.60396	0.857728	0.0838548	0.736378	-0.20011	-0.527869	0.582105	-0.444272	0.209157	0.0898769	-0.090708	0.11195	0.144132	-0.0141489	-0.0341893	-0.0497947	0.0038881	0.000441577
pinolidoxin	0.884926	-1.24268	0.903656	1.37323	1.81499	-0.464728	-0.14457	0.41033	-0.0401149	0.384771	0.0671894	0.193554	-0.126079	0.0298971	0.0971796	-0.0487102	-0.0281041	-0.00138721	0.00119166
pyrenolideA	2.93485	-1.63654	0.623003	0.014558	-0.107717	0.427812	-0.507103	0.450137	-0.274649	-0.11537	-0.0250604	0.0287049	0.08487	0.0585794	-0.0406059	-0.0136872	-0.0612489	0.00369484	-0.000492987
ferrulactone1	3.29424	-0.903945	0.117302	0.515059	0.450825	0.591246	-0.842588	0.584001	-0.406492	0.135624	0.289336	-0.157084	0.503237	0.260738	0.0419035	-0.0556515	-0.0975984	-0.00160918	-5.54077e-05
2,4,6,8-Tetramethyl-3,4-dihydroxydec-8(9)-enolide	2.02468	-2.16562	-0.13191	0.736635	-0.735557	0.546991	-0.467386	-0.619828	0.199143	0.371268	0.217912	0.13216	-0.106057	-0.0759356	0.0173288	0.0705345	0.0311155	-0.00120436	0.00185569
apicularenA	0.18305	-0.586134	-0.943406	-0.00726302	0.581531	1.0694	0.162611	0.111696	0.316183	-0.0972609	0.189723	0.128828	0.0652397	0.101509	0.190374	0.0282519	0.0190932	-0.00672159	-0.000820248
cladospolideA	2.02533	-2.44346	0.991203	-0.249937	-0.221483	0.0352672	-0.487814	0.0774972	0.0451135	0.329289	0.227109	-0.167599	-0.20502	0.0570946	0.0977294	-0.000111396	0.0309244	-0.00143817	-0.00125828
cladospolideB	1.91922	-2.2744	1.08764	-0.016383	0.618321	-0.468154	-0.528493	0.166333	0.0316577	0.350168	0.169733	-0.0937703	-0.175173	0.0707789	0.130986	-0.000910218	0.0269687	-0.00180663	-0.000206662
cladospolideD	2.28036	-1.8829	0.793763	0.0155662	0.276624	0.0915158	-0.624424	0.401314	-0.135682	0.0835133	0.0725473	0.0473154	-0.0733576	0.0584359	0.0504833	-0.0173356	-0.0150591	0.000479369	0.00194926
curvularin	1.78752	-0.674072	-0.32868	-0.18492	0.987212	0.484325	-0.75096	0.787696	0.262197	0.161316	0.273467	0.221614	0.173452	0.248555	0.124318	-0.0081237	-0.0691179	0.00383832	0.000912887
lyngbouilloside	-1.49194	-1.55635	-1.28889	1.68725	-1.90216	1.02917	0.151097	-0.418026	-0.0377628	0.129456	0.044002	0.102254	-0.128579	-0.217231	-0.0835836	-0.0212339	-0.0578327	0.000944104	0.00289836
methynolide	-0.565226	-2.0973	-0.254221	1.13086	-1.52533	0.0992955	-0.226515	-0.860742	-0.0455202	0.265497	-0.14264	0.208383	-0.181745	-0.124366	-0.0418685	0.143805	-0.0611192	0.00127721	0.000112173
neomethymycin	-0.86597	-2.49992	0.253768	0.818044	-1.1806	-0.478769	-0.114079	-0.770618	-0.15852	0.319425	-0.415251	0.146636	-0.295648	-0.147747	-0.0473468	0.0592745	0.0477852	-0.00284949	0.00173717
pladienolideA	-1.23636	-1.26972	-0.386243	2.18903	-0.639586	0.319786	0.0470617	-0.368127	0.198119	0.197639	0.00542946	0.116653	-0.170724	0.0245334	-0.0591414	-0.0797791	-0.00315485	6.16996e-05	0.00553265
fluvirucinA1	-0.655493	-1.77223	0.105704	0.862397	-0.942523	-0.0263923	-0.589397	-1.22516	0.487602	0.0447294	0.157543	0.143941	0.124761	-0.014361	0.298159	-0.0661067	0.0444673	0.00352032	0.00382377
hypothemycin	-0.031213	-1.89476	-0.231508	-1.06642	0.897281	-0.0638537	-0.150293	0.638778	0.307994	0.170859	0.0678717	0.236437	-0.273566	0.139259	0.12317	0.0295672	-0.0259568	0.00422369	-0.0056141
iriomoteolide3a	-0.651266	-1.44387	-0.394601	1.8573	2.71086	-0.908045	-0.19898	-0.260484	0.353828	0.213124	-0.0889798	0.233364	-0.0390166	0.0619321	0.162882	-0.0536225	0.0103266	0.00429506	0.000932978
AVG-MC_NP	1.24003	-1.88798	0.351457	0.262056	0.130266	-0.0134551	-0.282747	0.0431888	-0.0283187	0.200327	0.0972923	0.0207662	-0.097988	0.0369026	0.0537521	0.00324095	-0.00405833	-0.000952625	-0.00363129
a	2.40163	-1.07633	0.303377	-0.609265	-0.172717	-1.02106	0.1265	0.0133737	-0.349155	0.141403	0.218914	-0.42348	-0.0509875	0.0608206	-0.235798	0.0555748	-0.00730211	0.00119984	0.00127695
b	2.36791	-0.913221	0.0452532	-0.418153	-0.148938	-0.865399	0.000414446	-0.0114124	-0.316051	0.103506	0.218639	-0.390885	-0.0096893	0.0551796	-0.172196	0.0523548	-0.0357732	0.000948482	0.0011757
c	0.475777	-1.2006	1.10802	-1.78527	1.05819	-0.0627094	0.372309	-0.236582	0.231036	-0.178863	0.478027	0.279301	0.149712	0.340606	-0.630595	-0.2615	0.227698	-0.00167975	-0.00107467
d	1.0428	0.0450493	-2.01591	-0.115892	0.851549	-1.07277	-0.214282	-0.819151	0.23958	0.176832	0.247905	-0.352011	0.0961854	-0.301236	0.137321	-0.156937	-0.0844409	-0.00048956	-0.00480275
e	0.0522585	-0.315026	1.2473	-0.315563	1.52268	-1.32916	-0.196717	-0.19529	0.258897	-0.59004	0.161795	0.711952	-0.0184187	0.110575	-0.926878	-0.109944	0.146858	-0.00108907	0.00146466
f	1.32515	-1.19633	-0.131101	-0.745589	1.9016	-0.805607	0.121663	-0.686879	0.387386	-0.00744206	0.237501	-0.11418	0.183565	0.222043	0.07601	-0.12412	0.0996799	0.00194667	-0.00124947
g	0.90845	0.497481	-1.26853	-0.494268	-0.0365826	-1.22159	-0.744802	-0.0943108	0.0905446	-0.534313	0.246529	-0.303463	-0.188242	-0.077859	-0.196353	-0.106855	-0.0757497	-0.00270215	-0.000775653
h	0.943991	0.369778	-1.02376	-0.665355	-0.0606658	-1.35116	-0.623225	-0.0559988	0.0697179	-0.538906	0.216527	-0.314979	-0.205189	-0.0745336	-0.264007	-0.099752	-0.0530132	-0.00260561	-0.000756869
i	0.127075	1.06173	-1.04401	0.448772	0.0347274	-2.31682	-0.393921	-0.320785	-0.157182	-0.694801	-0.292786	0.0139621	-0.255334	-0.201047	0.426876	0.244627	-0.407727	0.00111447	-0.0014814
j	1.39781	-0.760042	0.678197	-1.14184	0.062929	-0.455433	-0.650598	0.0586244	0.202687	-0.567659	0.349336	-0.273857	-0.0372618	0.246965	-0.377325	-0.165181	0.067465	0.000337845	0.00174164
k	1.40509	-0.88638	0.941954	-1.32236	0.0419535	-0.578478	-0.532998	0.0928681	0.189255	-0.564401	0.355754	-0.257954	-0.0588241	0.2671	-0.505105	-0.178742	0.113089	0.000595882	0.00183165
AVG-cpd	1.12541	-0.387754	-0.107619	-0.649238	0.458571	-1.01043	-0.250934	-0.205994	0.0711134	-0.295018	0.218758	-0.130635	-0.0340501	0.0584677	-0.237275	-0.0802915	0.00149565	-0.000419355	0.00444588

## Sheet: data-f
	PC1	PC2	PC3
Lipitor	0.164034	3.00048	-0.814099
Nexium	1.73151	0.897557	0.128838						PC1	PC2	PC3	PC4	PC5	PC6	PC7	PC8	PC9	PC10	PC11	PC12	PC13	PC14	PC15	PC16	PC17	PC18	PC19
Prevacid	1.6126	1.1921	-0.0896246					Standard deviation	2.8889	1.8389	1.5594	1.31127	1.0879	0.8607	0.60642	0.49918	0.44437	0.35822	0.31767	0.28422	0.24957	0.21234	0.17629	0.12802	0.09655	0.002339	0.001926
Flonase	-0.985992	-1.60309	-2.03598					Proportion of Variance	0.4371	0.1771	0.1274	0.09006	0.062	0.0388	0.01926	0.01305	0.01034	0.00672	0.00529	0.00423	0.00326	0.00236	0.00163	0.00086	0.00049	0	0
Serevent	1.09394	1.59513	0.171596					Cumulative Proportion	0.4371	0.6143	0.7417	0.83171	0.8937	0.9325	0.95177	0.96482	0.97516	0.98188	0.98717	0.9914	0.99466	0.99703	0.99865	0.99951	1	1	1
Singulair	0.587711	3.85758	-2.79785
Effexor	2.44947	0.0662473	0.278909
Plavix	2.302	0.905128	-0.99614
Zocor	0.237422	-1.09873	-1.13953
Norvasc	1.18979	0.875699	0.604308
Lexapro	2.03685	1.12069	-0.835715
Seroquel	1.65153	1.54554	-0.933402
Protonix	1.28186	1.12817	0.306375
Ambien	2.48378	1.45036	-0.631838
Actos	1.75004	1.52233	-0.397745
Zoloft	2.03239	1.13556	-1.83594
Wellbutrin	2.84829	-0.253859	0.191684
Avandia	1.54487	1.55084	0.111107
Risperdal	1.60937	2.05853	-0.815769
Zyprexa	2.24439	1.19168	-0.683884
Topamax	0.502454	-1.93275	0.181069
Toprol	2.28014	-0.333292	1.0757
Zetia	0.889797	1.86756	-0.927685
Fosamax	2.0312	-1.34302	3.78153
Abilify	1.63139	2.16934	-1.19797
Levaquin	1.3218	0.291778	0.393929
Lamictal	2.42783	0.977556	1.00405
Celebrex	1.72902	2.27107	-0.514722
Benazepril	0.664733	0.94335	0.257594
Zyrtec	1.65417	1.34711	-0.0014188
Coreg	0.860507	1.95545	-0.934349
Valtrex	0.97102	0.345956	2.09338
Adderall	3.23389	-1.07262	0.818599
Aciphex	1.55598	1.13809	0.22515
Cymbalta	2.13851	1.47637	-1.35795
Crestor	0.566199	0.769632	1.12246
Diovan	0.905649	2.54056	0.258506
Tricor	2.19971	1.45451	-0.942708
Concerta	2.23185	-0.493984	0.491284			PC2
Imitrex	2.14359	0.474644	0.562333
AVG-DRUG	1.54278	0.923125	-0.143252
Forskolin	-0.524314	-2.49793	-0.176482
SQ26180	2.11727	-1.51083	2.4752
CephamycinC	-0.288667	-1.04034	2.7541
Thienamycin	1.49735	-2.07721	1.56192
Artemisinin	0.438223	-3.10258	-1.66648
Coformycin	0.217619	-1.82604	1.8599
Arglabin	1.00021	-2.2215	-1.5888
Mizoribine	0.657809	-1.75217	2.68736
Compactin	0.167707	-1.14728	-0.84876
Bestatin	1.22071	-1.03397	2.26595
Plaunotol	3.01765	0.0779267	0.759207
Spergualin	0.603663	0.448693	4.28711
Taxol	-4.11992	1.61561	-1.22816
Rapamycin	-4.04795	-1.66694	-2.52497
AvermectinB1a	-5.80086	-1.19864	-2.41766
PseudomonicAcidA	-1.37217	-0.529732	1.06356
Daptomycin	-11.6706	4.46864	5.13956
MidecamycinA1	-4.13567	-1.53649	-0.0590656
EchinocandinB	-6.90549	0.511064	1.70577
CalicheamicinG1	-8.45649	2.17829	0.462649
Validamycin	-3.64283	-3.11775	3.31463
CyclosporinA	-4.7878	0.960079	0.922508
FK506	-3.23031	-2.06189	-1.84448
Lipstatin	0.353584	1.13523	-0.413148
Geldanamycin	-0.970536	-0.525315	-0.379172
Actinonin	0.98796	-0.716004	2.06664
Discodermolide	-2.41802	-1.026	0.999762
Monensin	-3.69822	-1.48329	-0.897387										PC1
CalyculinA	-5.47073	0.39279	1.51065
AmphotericinB	-6.25183	-3.27936	0.434362
Adriamycin	-1.91986	0.173042	0.0175971
GinkgolideB	-1.94972	-3.89986	-1.78906
PhorbolMA	-1.6442	-0.483097	-2.12904
Vancomycin	-11.3473	1.83129	0.0597775
TrapoxinB	-1.04535	1.74366	-0.157302
Vincristine	-3.13148	0.936614	-2.6028
Colchicine	0.902003	0.0094376	-0.685029
Trichostatin	2.21388	-0.0573582	0.691507
Fumagillin	0.00410529	-0.530985	-0.977478
Staurosporine	-0.397043	0.609623	-4.40467
ErythromycinA	-3.86424	-2.65095	0.0559485
Streptomycin	-4.69358	-2.01227	3.96401
PenicillinG	1.34746	-0.406621	0.238464
ZaragozicAcidA	-3.05042	0.0382165	0.486402
TalaromycinB	1.28877	-1.56945	-0.906952
Spongistatin1	-8.90053	-2.92549	-3.22882
Radicicol	1.03901	-1.37189	-1.36088
SalicylihalamideA	0.720922	-0.0324208	-0.871993
BrevetoxinB	-6.82235	-4.04199	-7.04648
RifamycinB	-3.64612	-0.13007	-1.53752
Quinine	1.21619	-0.206709	-0.761718
MycobactinS	-2.35625	3.24402	0.679297
Telomestatin	-1.52532	2.57122	-4.43061
DuocarmycinA	-0.146005	1.44074	-0.833329
Bleomycin	-11.6812	5.44366	5.20121
BrefeldinA	1.05006	-2.40888	-0.156814
CytochalasinB	-0.831726	-0.536003	-1.65018
EpothiloneA	-0.507855	-0.421943	-0.972913				PC3
Apoptolidin	-7.88651	-1.62695	-0.497345
Lactacystin	0.411023	-1.99126	2.58456
AVG-NP	-2.21141	-0.551697	-0.0113872
ChemBridge1	1.81509	2.23212	0.0409919
ChemBridge2	2.48704	0.948395	0.948637
ChemBridge3	1.25042	2.55062	0.0157199
ChemBridge4	1.41826	2.17618	-0.366455
ChemBridge5	1.79139	1.74577	0.387776
ChemBridge6	1.79044	1.75086	0.380169
ChemBridge7	1.03631	2.35629	0.563641
ChemBridge8	1.36784	2.3646	0.265757
ChemBridge9	1.46332	3.08267	-0.795523
ChemBridge10	1.34317	3.26584	-1.03461
AVG-ChemBridge	1.57509	2.25482	0.0420344
ChemDiv1	1.66939	2.06419	-0.956602
ChemDiv2	0.556804	1.71075	0.0802712
ChemDiv3	0.823591	2.0357	0.113099
ChemDiv4	0.555987	1.71801	0.0683038
ChemDiv5	0.419969	2.16563	0.39777
ChemDiv6	0.600097	2.20223	0.237438
ChemDiv7	1.23208	1.89474	0.0229175
ChemDiv8	1.28256	1.63513	-0.769386
ChemDiv9	0.799848	2.99555	-0.364797
ChemDiv10	0.727324	2.25822	0.0357998
AVG-ChemDiv	0.869607	2.07138	-0.112159
decarestrictineA1	1.69449	-3.12072	0.790685
decarestrictineB	1.67721	-3.40242	1.06937
decarestrictineC1	2.02532	-2.62837	1.5482
decarestrictineD	1.43529	-2.96754	2.02671
diplodialideA	2.95435	-1.67093	0.647667
jasmineketolactone	2.4562	-2.08265	-0.135796												PC1
phoracantholideI	2.87461	-1.54064	0.769858
phoracantholideJ	2.8864	-1.60396	0.857728
pinolidoxin	0.884926	-1.24268	0.903656
pyrenolideA	2.93485	-1.63654	0.623003
ferrulactone1	3.29424	-0.903945	0.117302
2,4,6,8-Tetramethyl-3,4-dihydroxydec-8(9)-enolide	2.02468	-2.16562	-0.13191
apicularenA	0.18305	-0.586134	-0.943406
cladospolideA	2.02533	-2.44346	0.991203
cladospolideB	1.91922	-2.2744	1.08764
cladospolideD	2.28036	-1.8829	0.793763
curvularin	1.78752	-0.674072	-0.32868
lyngbouilloside	-1.49194	-1.55635	-1.28889
methynolide	-0.565226	-2.0973	-0.254221
neomethymycin	-0.86597	-2.49992	0.253768
pladienolideA	-1.23636	-1.26972	-0.386243
fluvirucinA1	-0.655493	-1.77223	0.105704
hypothemycin	-0.031213	-1.89476	-0.231508
iriomoteolide3a	-0.651266	-1.44387	-0.394601
AVG-MC_NP	1.24003	-1.88798	0.351457
a	2.40163	-1.07633	0.303377
b	2.36791	-0.913221	0.0452532
c	0.475777	-1.2006	1.10802
d	1.0428	0.0450493	-2.01591
e	0.0522585	-0.315026	1.2473
f	1.32515	-1.19633	-0.131101
g	0.90845	0.497481	-1.26853
h	0.943991	0.369778	-1.02376
i	0.127075	1.06173	-1.04401
j	1.39781	-0.760042	0.678197
k	1.40509	-0.88638	0.941954
AVG-cpd	1.12541	-0.387754	-0.107619
						PC2
														PC3
