# Supplementary material for: Pyrrolidine and piperidine based chiral spiro and fused scaffolds via build/couple/pair approach
Source: Royal Society of Chemistry journal article supplement (doi:10.1039/c3ra47714b), 2014-01-01
Supplement: c3ra47714b2.pdf [file c3ra47714b2.pdf]

## **Pyrrolidine and piperidine based chiral spiro and fused scaffolds via Build/Couple/Pair approach**

Rajinikanth Mamidala,<sup>b</sup> Surendra V. Damerla<sup>b</sup>, Rambabu Gundla<sup>b</sup>, Maringanti. T.

Chary<sup>c</sup>, Y. L. N. Murthy<sup>d</sup>, and Subhabrata Sen<sup>a\*</sup>

<sup>a</sup> Department of Chemistry, Shiv Nadar University, Dadri, UP, India

<sup>b</sup> GVKBioscience, 28A IDA Nacharam, Hyderabad, AP, India.

<sup>c</sup> JNTU-H College, Nachupally, Karimnagar, AP, India

<sup>d</sup> Andhra University, Vishakhapatnam, AP, India.

# Compound 4

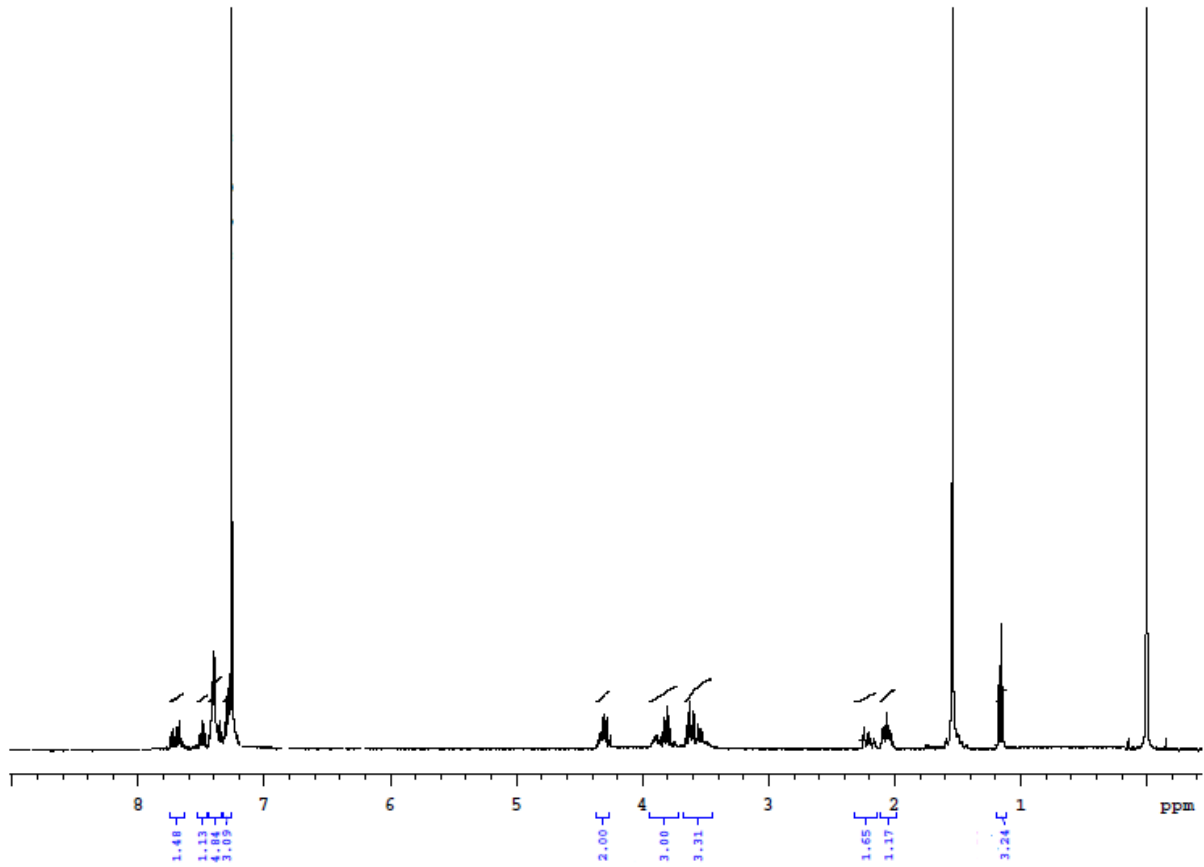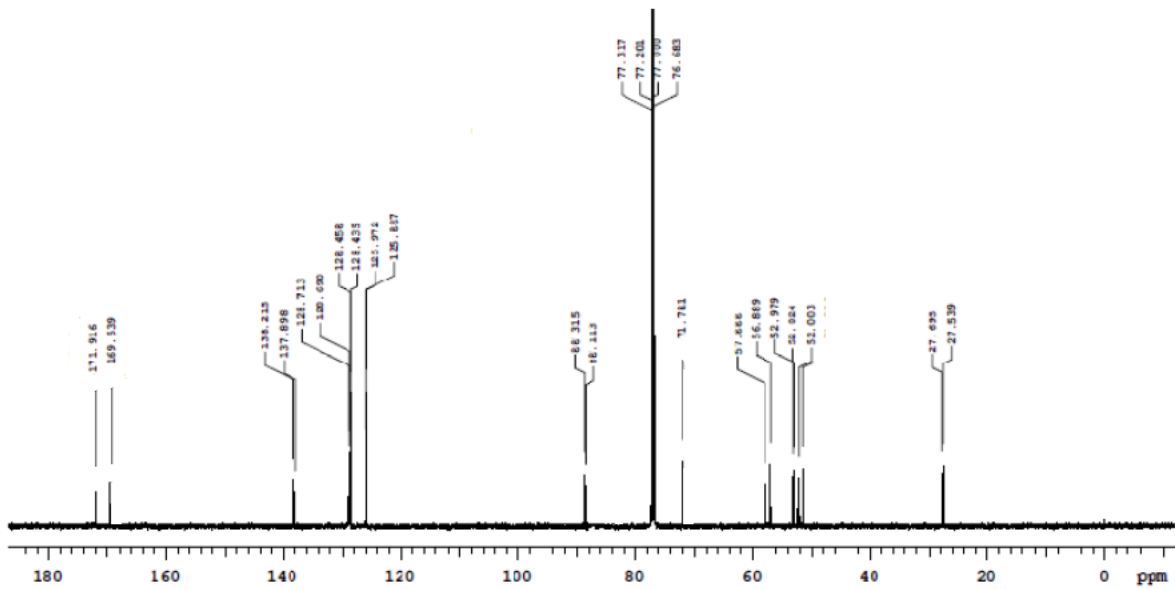

# Compound 5

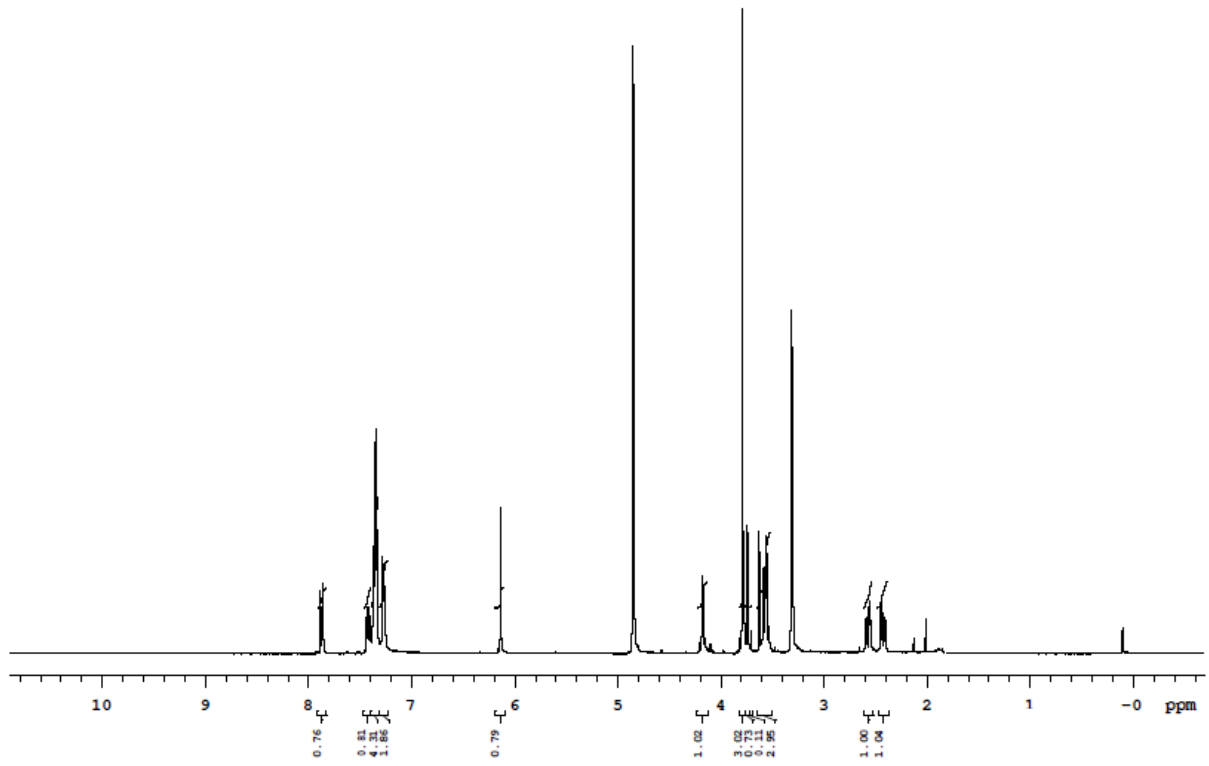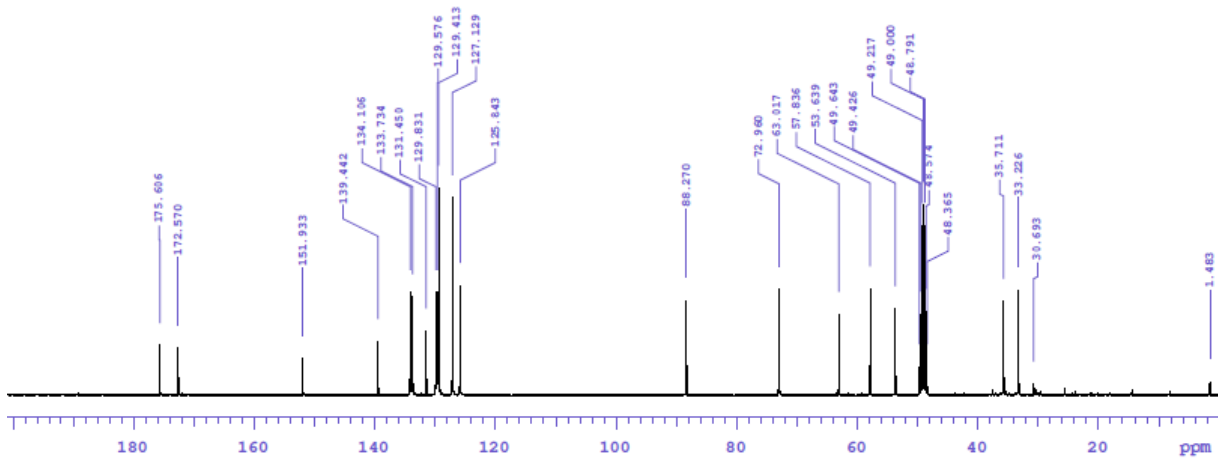

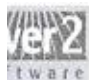

# CHIRAL PAK IA RPT

## ANALYTICAL REPORT-MCL-III GVK BIOSCIENCES PVT LTD

### SAMPLE INFORMATION

|                    |                |                     |                          |
|--------------------|----------------|---------------------|--------------------------|
| Sample Name :      | DVS-NPR-22-P-1 | Acquired By :       | System                   |
| Sample ID :        | 103            | Date Acquired :     | 7/27/2011 7:39:45 AM IST |
| Injection Volume : | 10.00 ul       | Proc. Chnl. Descr : | PDA 215.0 nm             |
| Run Time :         | 25.0 Minutes   | System Name :       | ANL_MCL_HPLC_02          |

### HPLC CONDITIONS

|                |                                    |
|----------------|------------------------------------|
| Column :       | CHIRAL PAK IA 4.6 X 250mm , 5µm    |
| Column ID :    | ANL_CHIRAL_110                     |
| Mobile Phase : | D=0.1%TFA in n-HEXANE , C =Ethanol |
| Isocratic :    | 80:20                              |
| Flow Rate :    | 1.0 ml/min                         |
| Column Temp :  | NA                                 |
| Mobile Phase : | Ethanol                            |

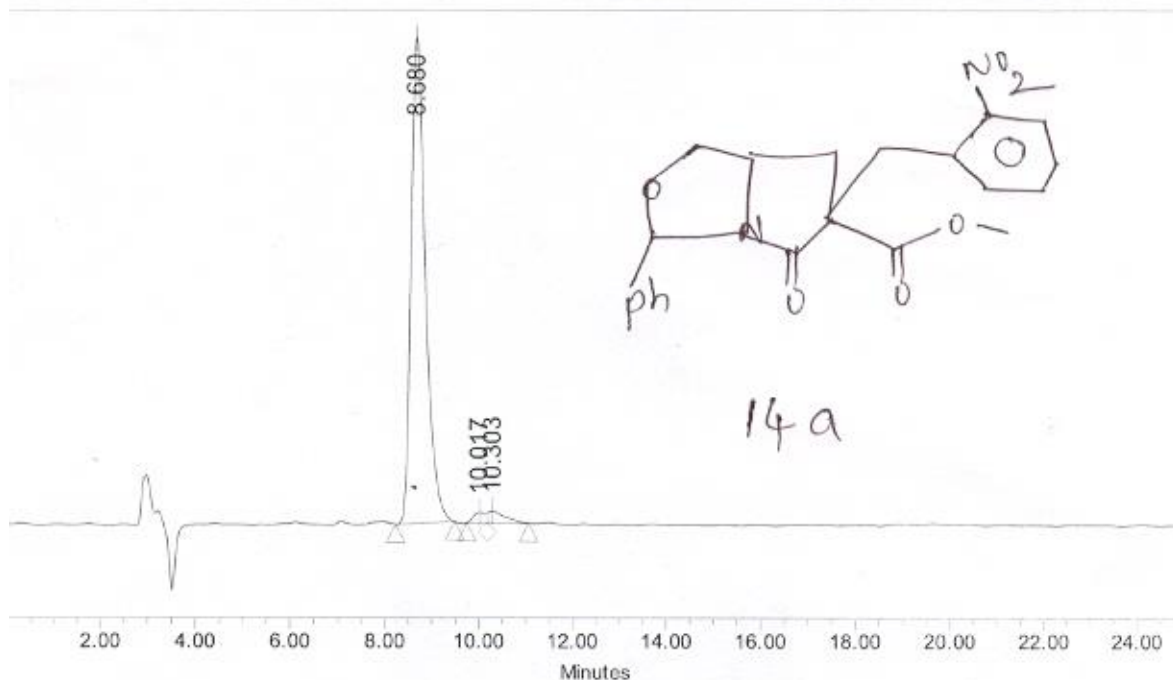

### Peak Results

| Retention Time (min) | Area     | % Area |
|----------------------|----------|--------|
| 8.680                | 10713833 | 95.28  |
| 10.903               | 206880   | 1.84   |
| 11.903               | 323909   | 2.88   |

# Compound 7

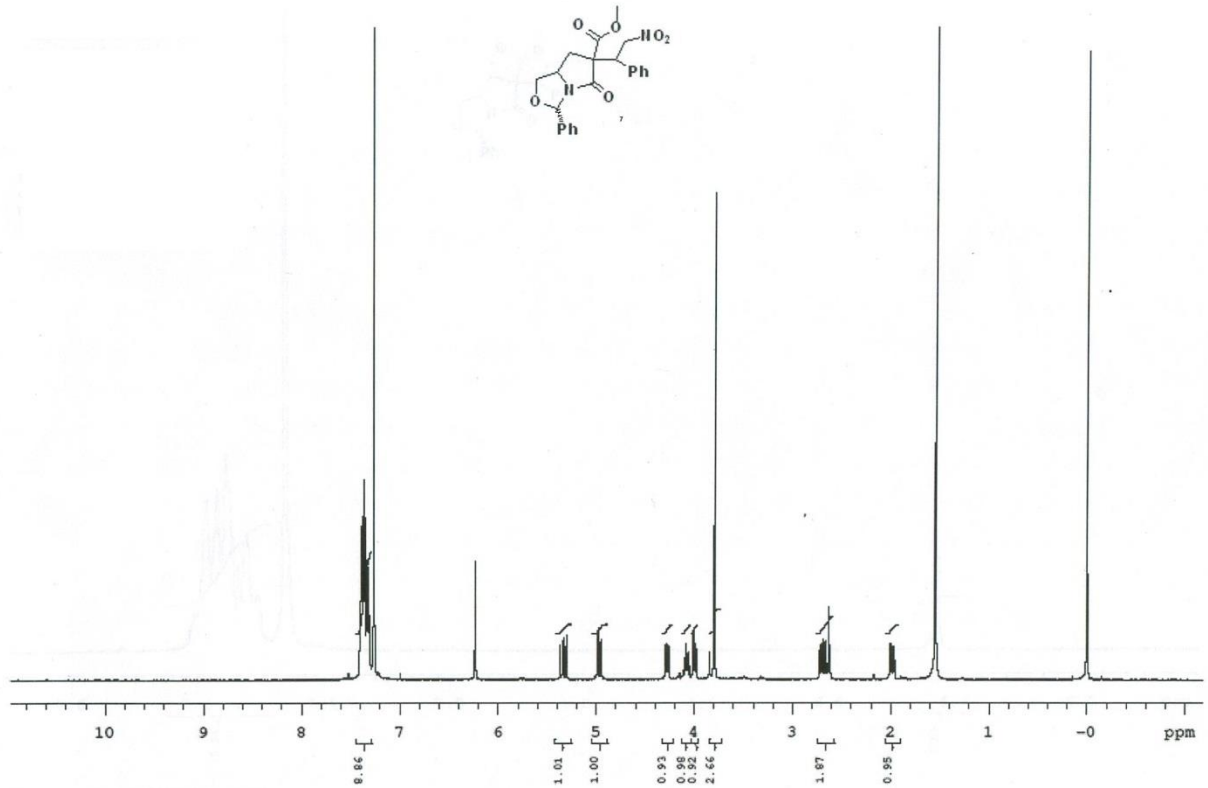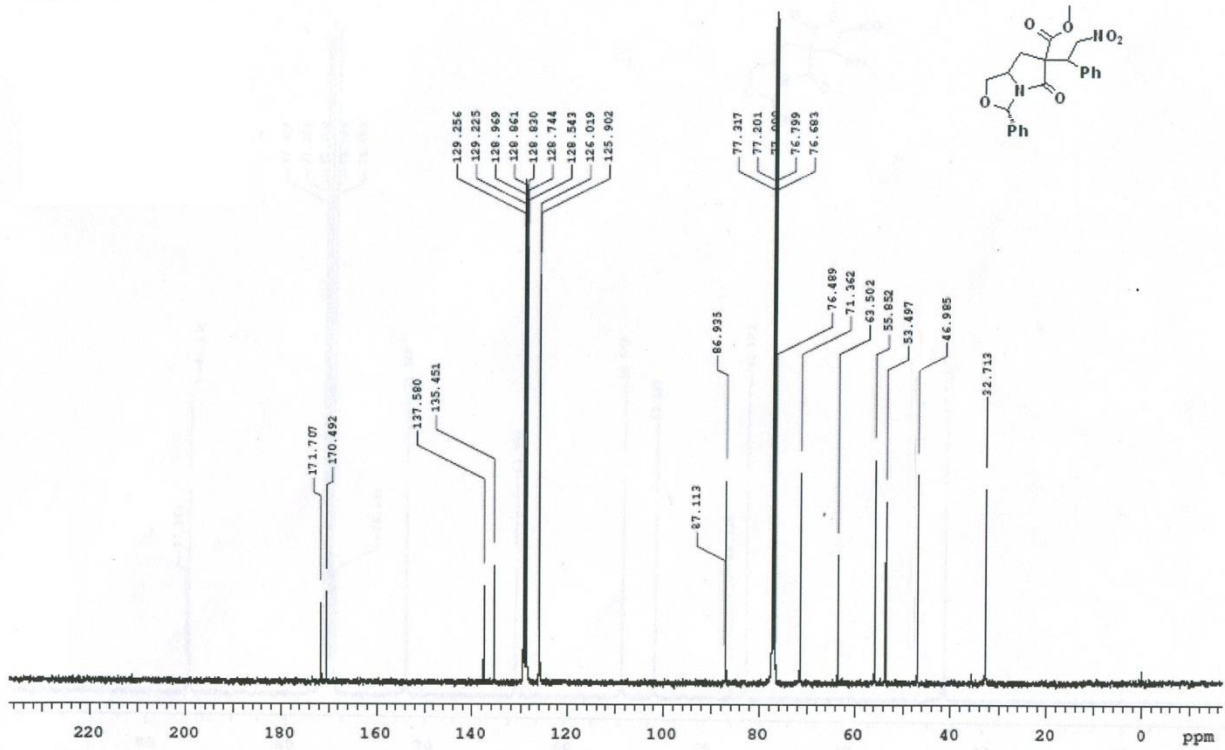

# CHIRAL PAK IA RPT

## SAMPLE INFORMATION

|                    |              |                     |                 |
|--------------------|--------------|---------------------|-----------------|
| Injection Volume : | 15.00 ul     | Proc. Chnl. Descr : | PDA 215.0 nm    |
| Run Time :         | 25.0 Minutes | System Name :       | ANL_MCL_HPLC_02 |

## HPLC CONDITIONS

Column : CHIRAL PAK IA 4.6 X 250mm , 5µm  
Column ID : ANL\_CHIRAL\_110  
Mobile Phase : A= n-HEXANE ,B=IPA  
ISOCRATIC : 60:40  
Flow Rate : 1.0 ml/min  
Column Temp : NA  
Diluent : Ethanol

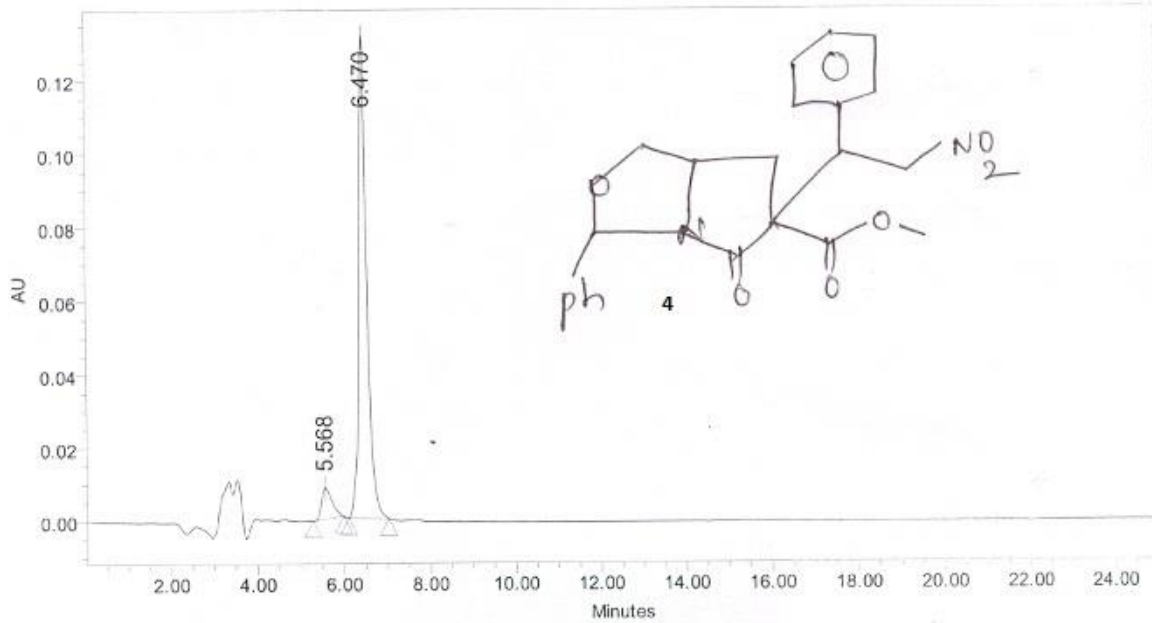

## Peak Results

|   | RT    | Area    | % Area |
|---|-------|---------|--------|
| 1 | 5.568 | 143303  | 7.87   |
| 2 | 6.470 | 1677926 | 92.13  |

# Compound 8

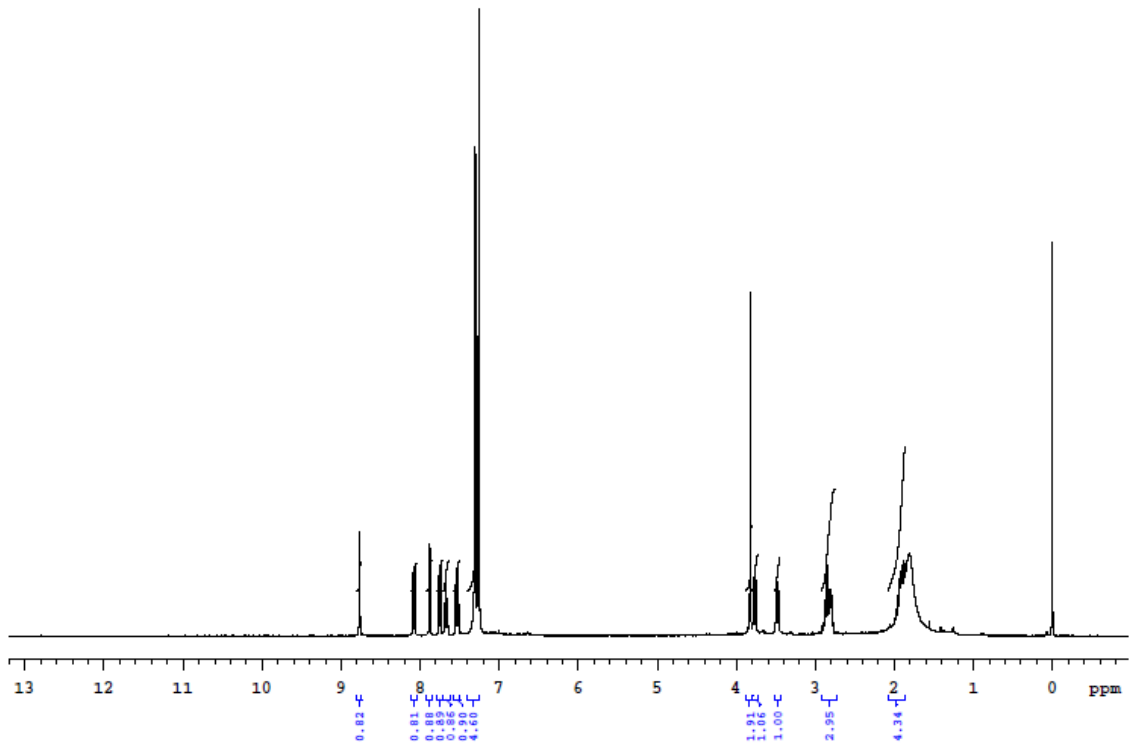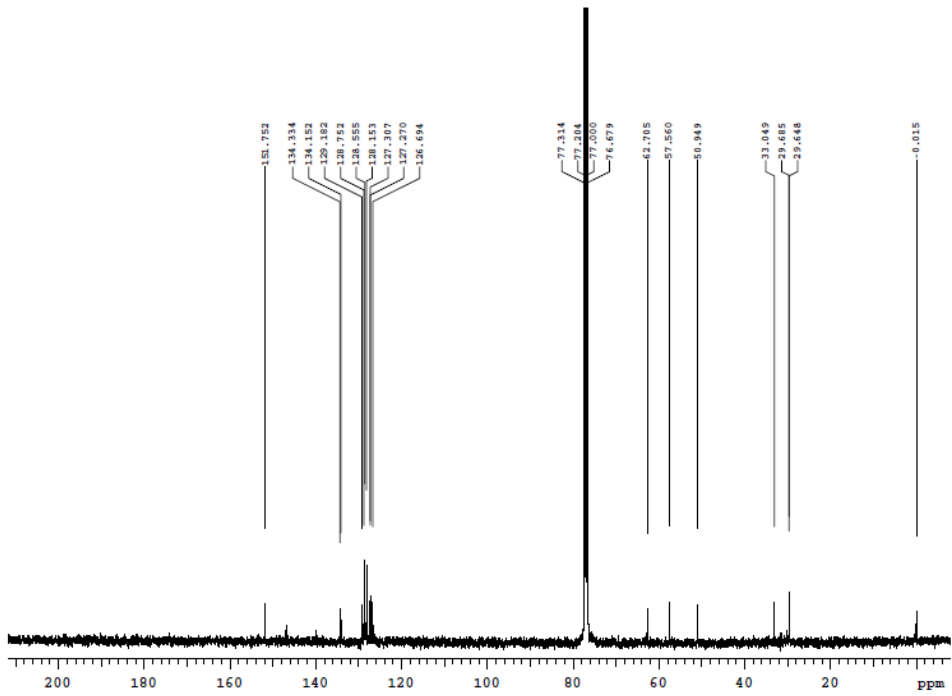

# Compound 9

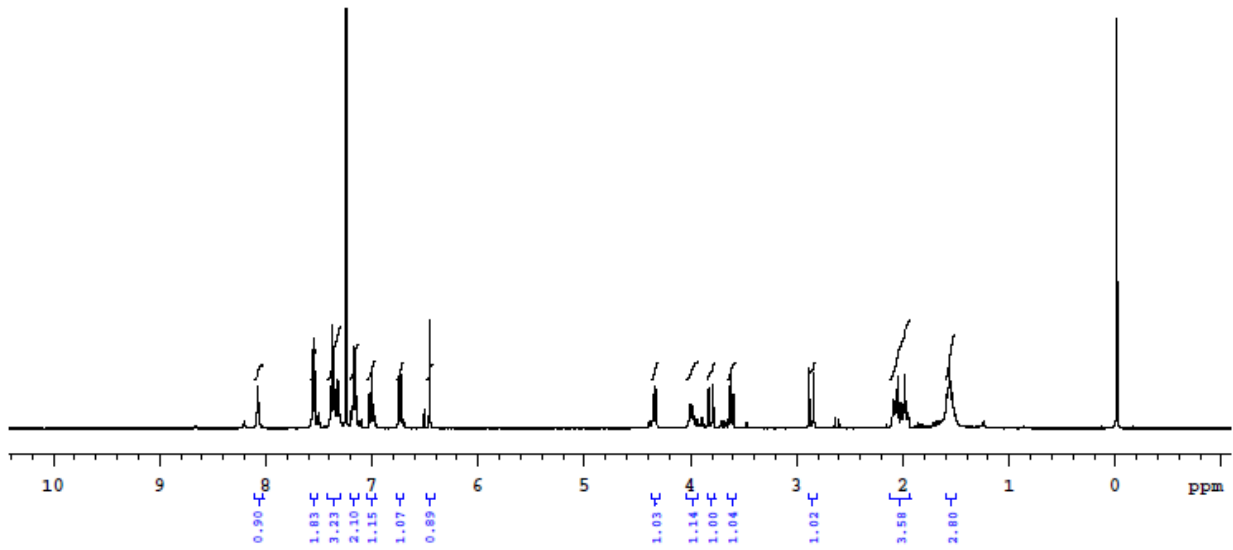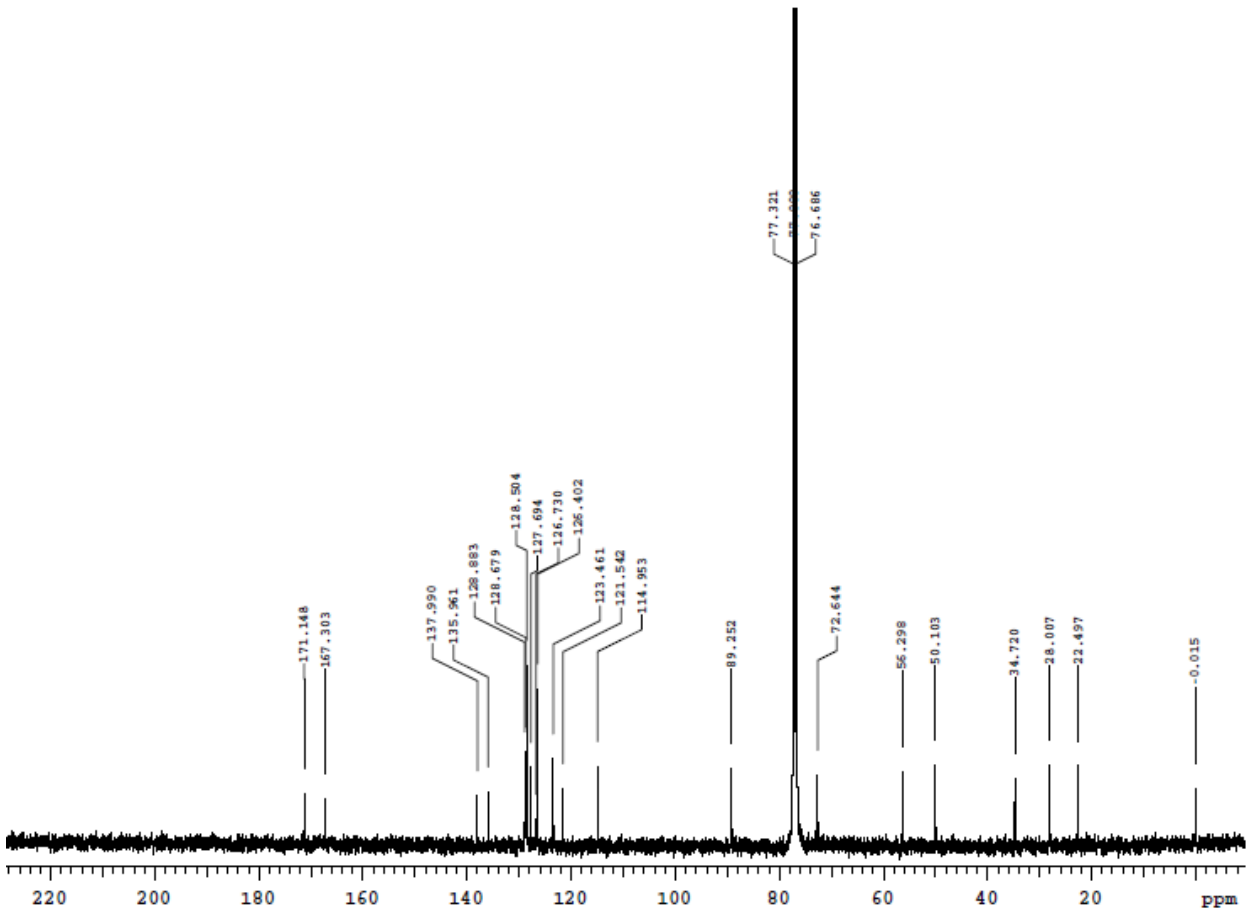



# Compound 10

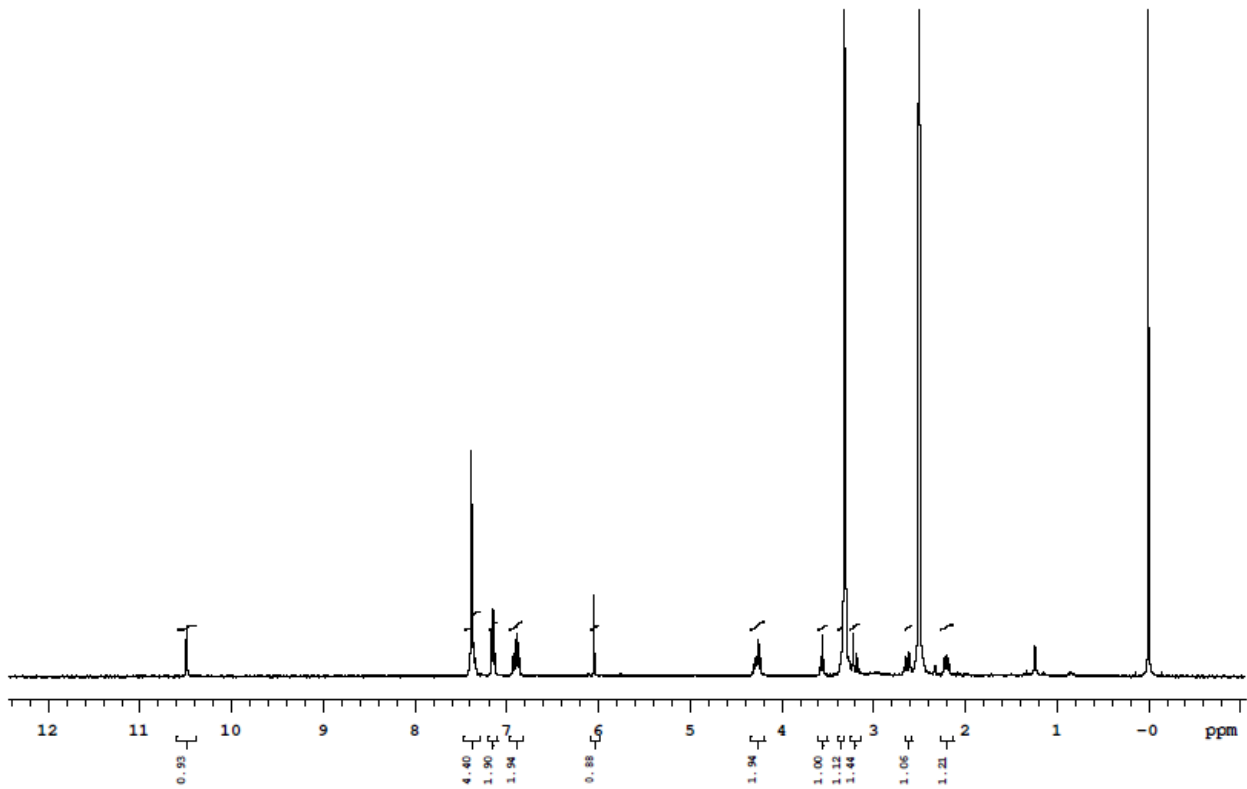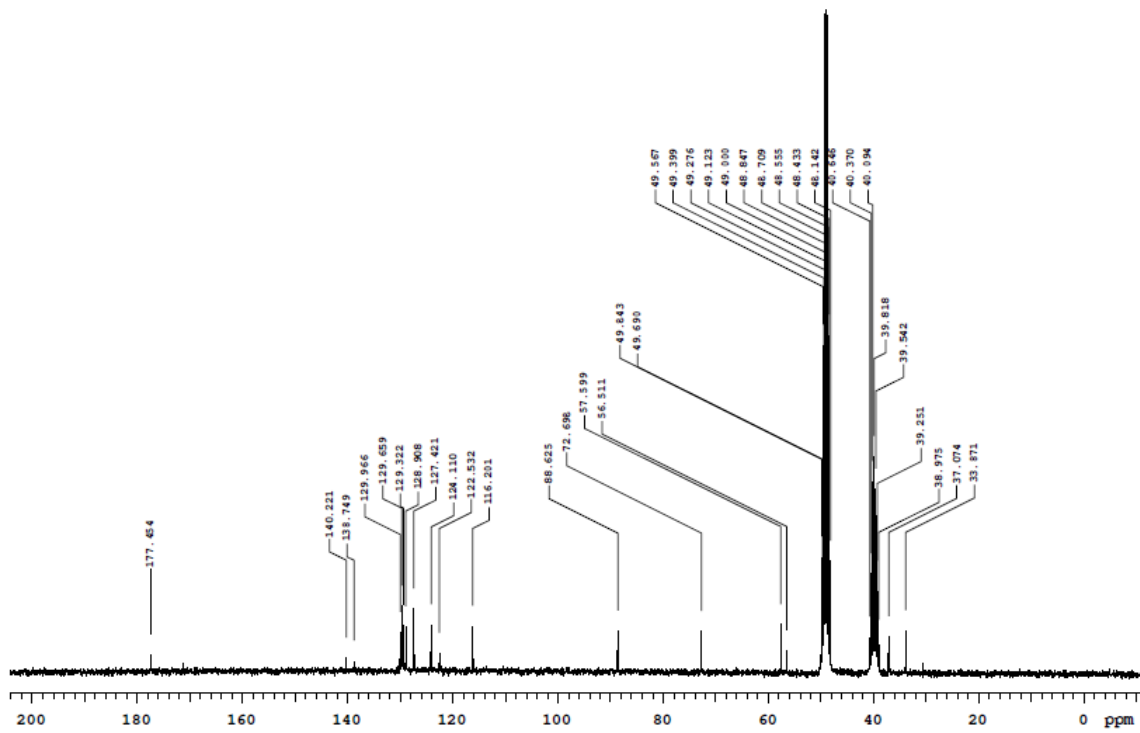

# Compound 11

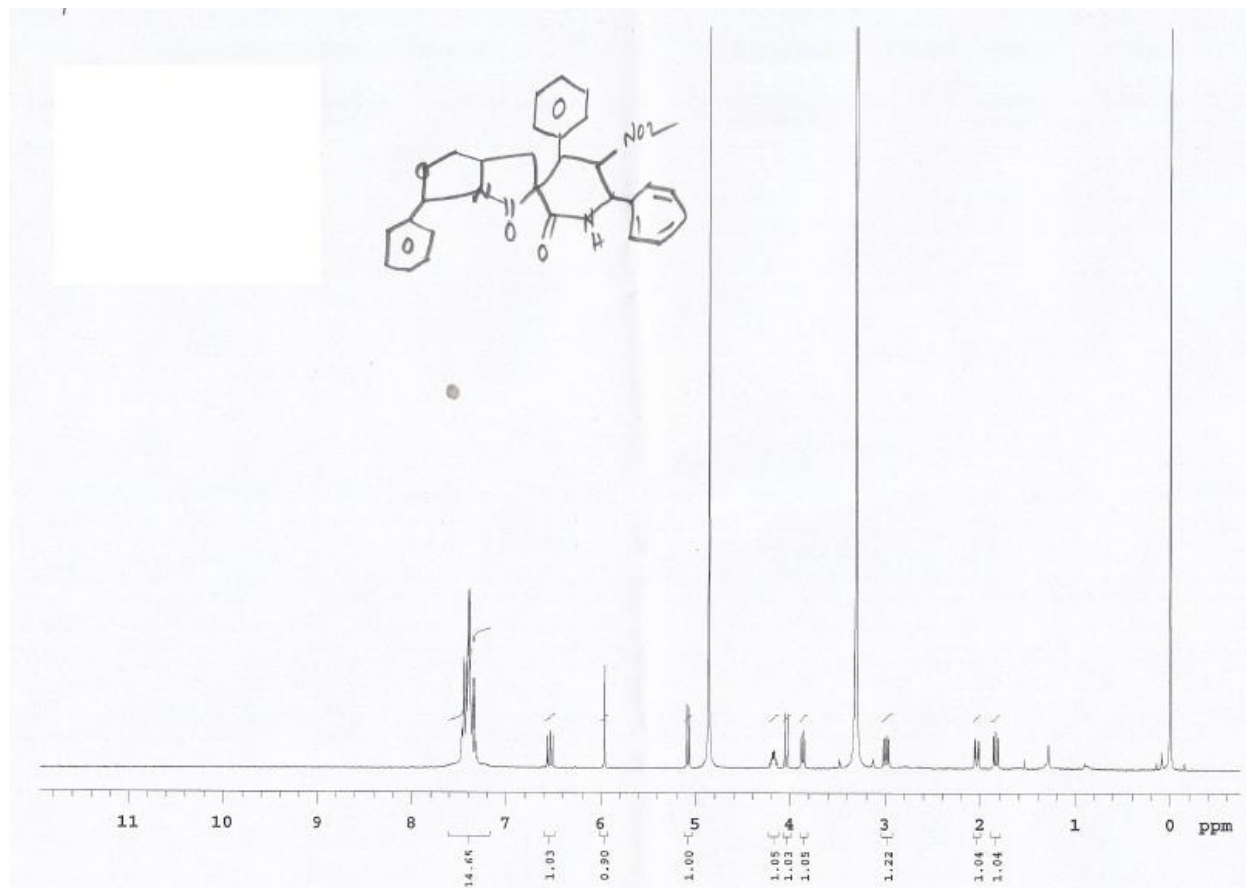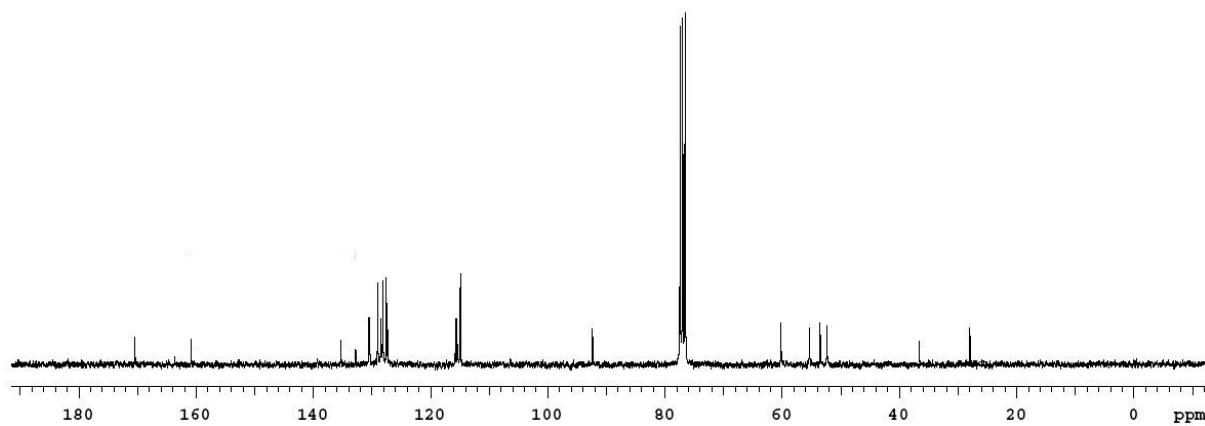

# Compound 12

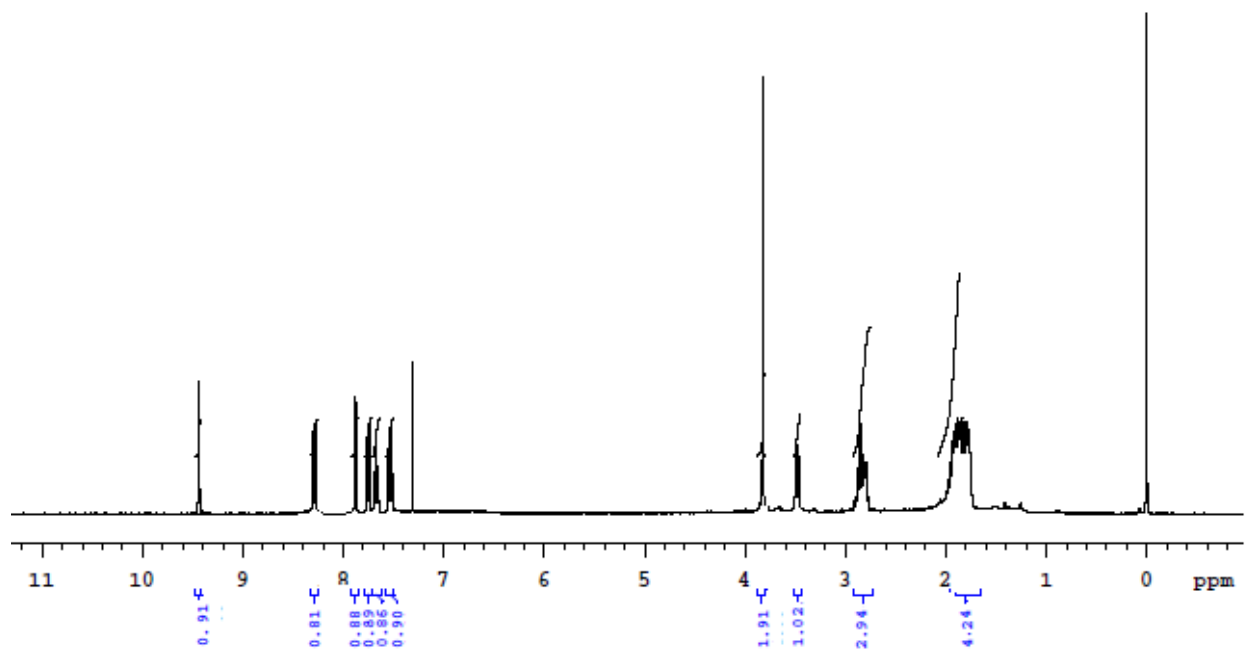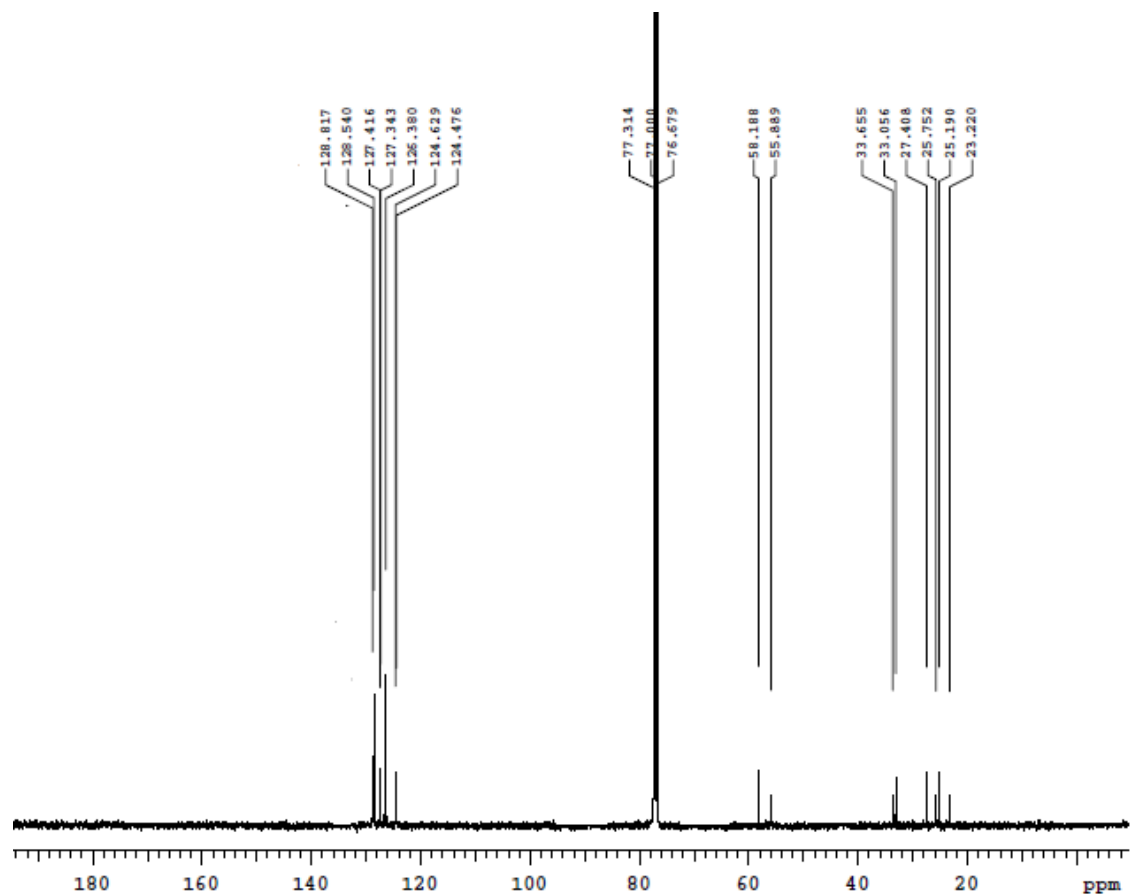

# Compound 13

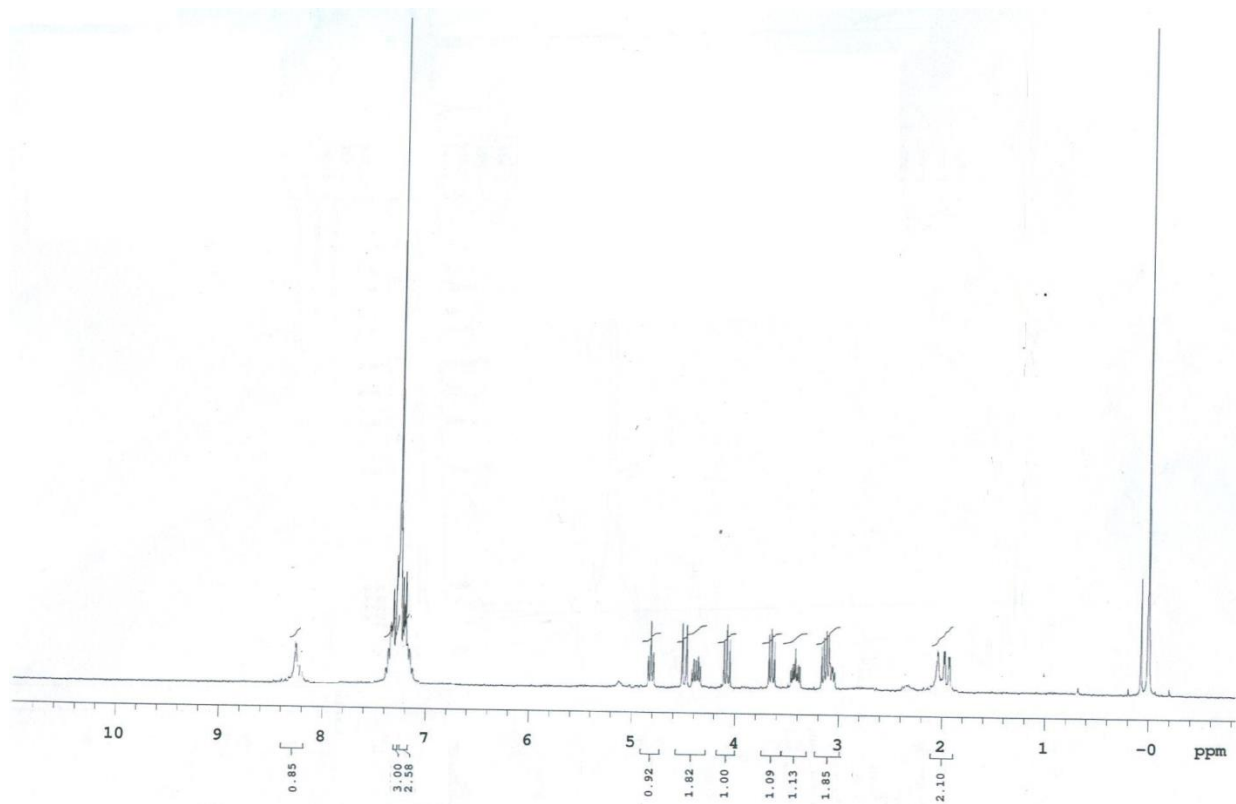

# Compound 14

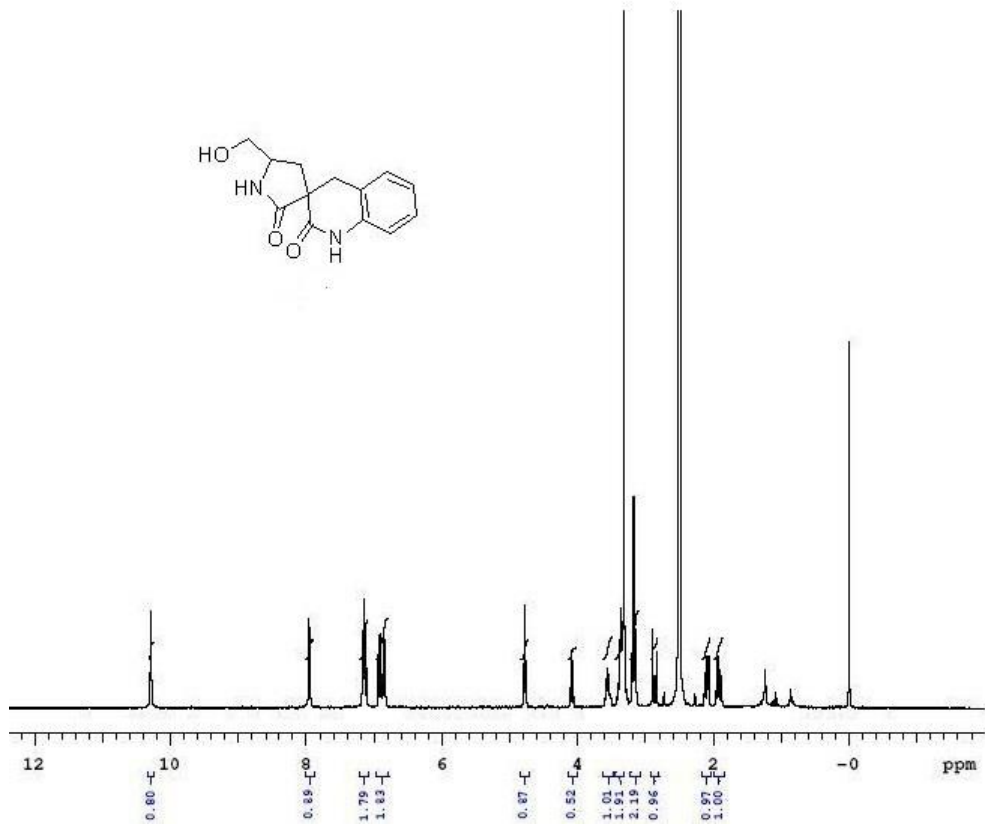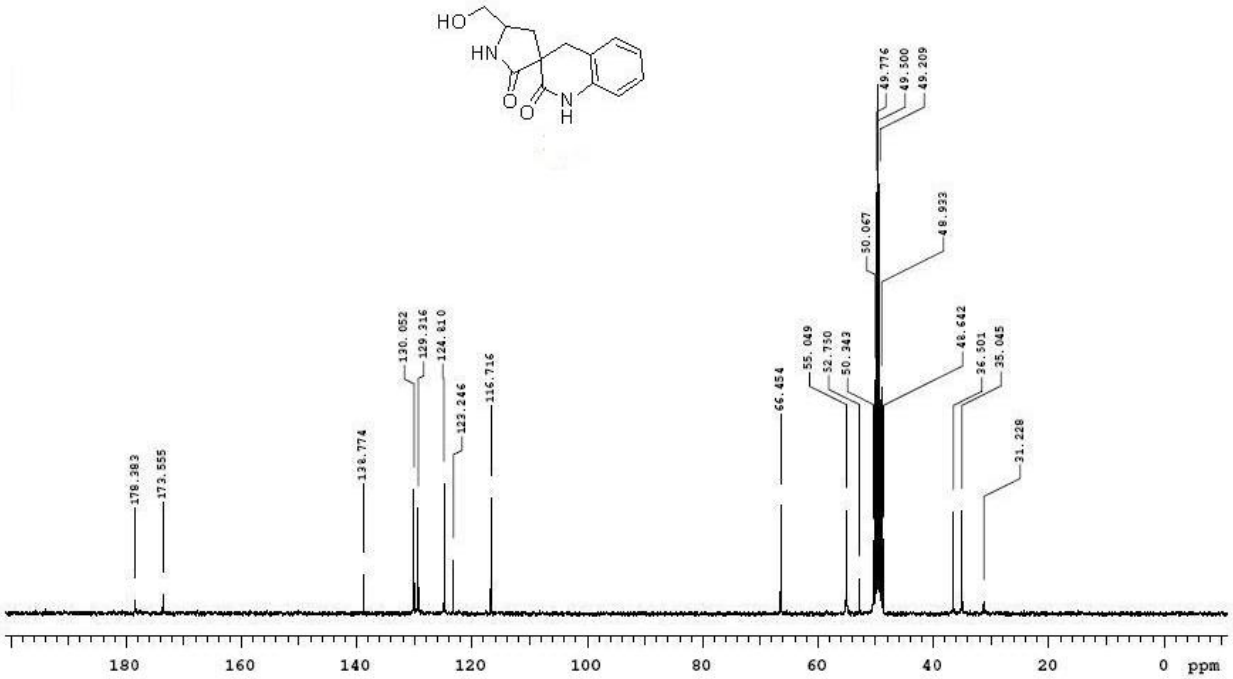

**ANALYTICAL REPORT-MCL-III  
GVK BIOSCIENCES PVT LTD**

**SAMPLE INFORMATION**

|                  |                |                   |                             |
|------------------|----------------|-------------------|-----------------------------|
| Sample Name      | : DVS-NPR-27-P | Acquired By       | : System                    |
| Vial No          | : 104          | Date Acquired     | : 7/27/2011 12:59:32 PM IST |
| Injection Volume | : 15.00 ul     | Proc. Chnl. Descr | : PDA 215.0 nm              |
| Run Time         | : 25.0 Minutes | System Name       | : ANL_MCL_HPLC_02           |

**HPLC CONDITIONS**

|              |                                   |
|--------------|-----------------------------------|
| Column       | : CHIRAL PAK IA 4.6 X 250mm , 5µm |
| Column ID    | : ANL_CHIRAL_110                  |
| Mobile Phase | : A= n-HEXANE ,B=IPA              |
| ISOCRATIC    | : 60:40                           |
| Flow Rate    | : 1.0 ml/min                      |
| Column Temp  | : NA                              |
| Diluent      | : Ethanol                         |

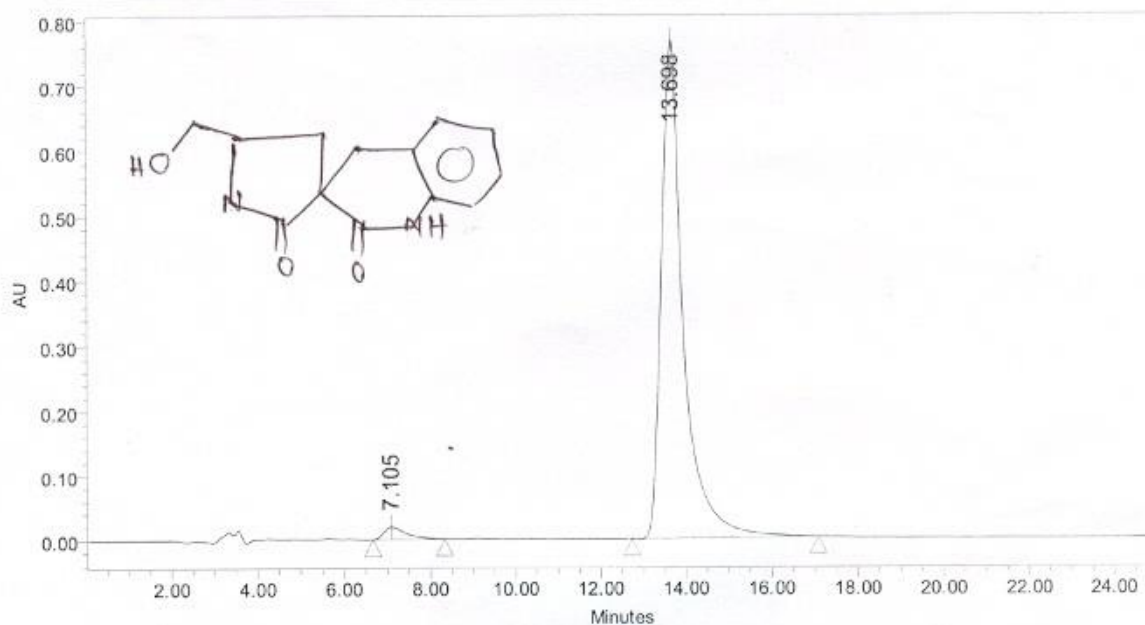

**Peak Results**

| RT       | Area     | % Area |
|----------|----------|--------|
| 1 7.105  | 682433   | 2.42   |
| 2 13.698 | 27508018 | 97.58  |

# Compound 15a

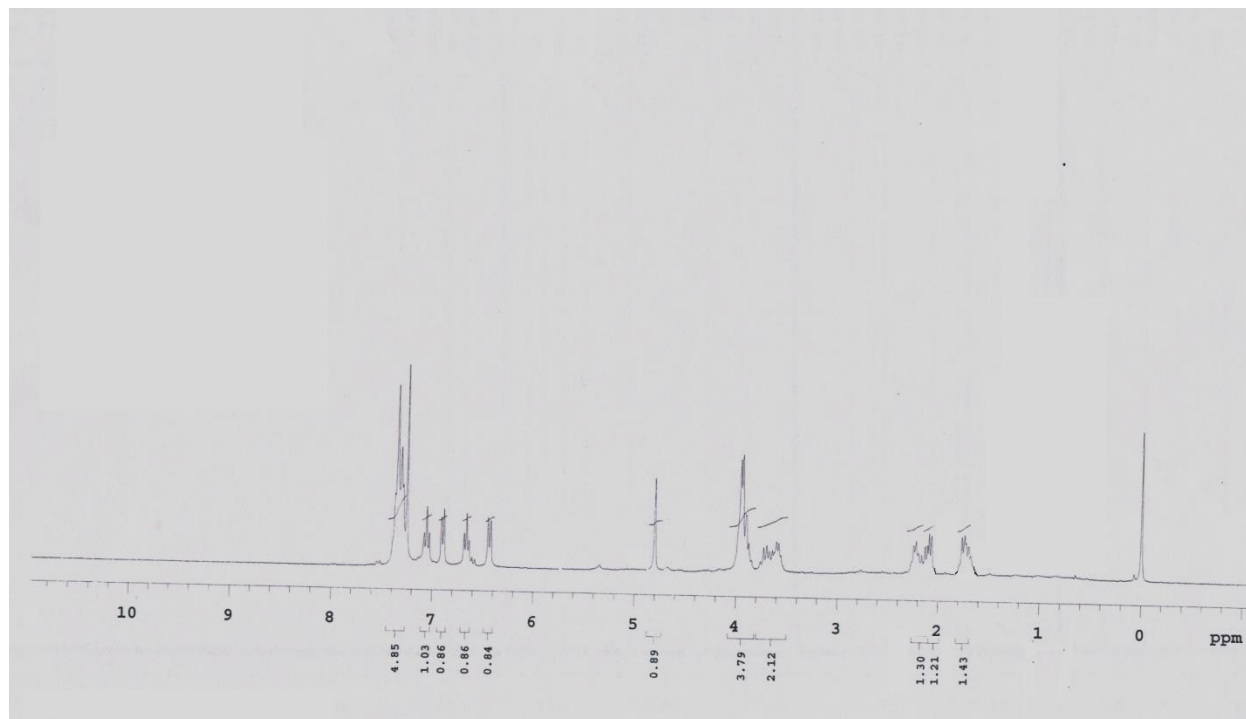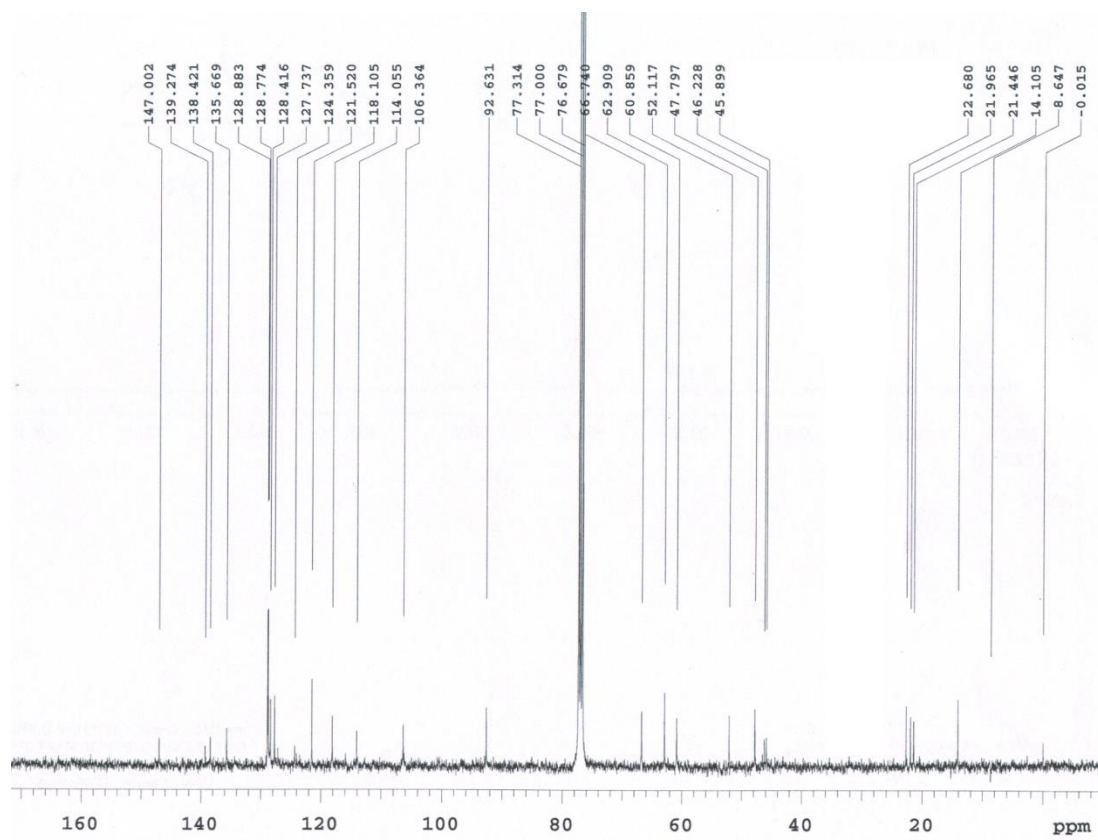

# Compound 15

7

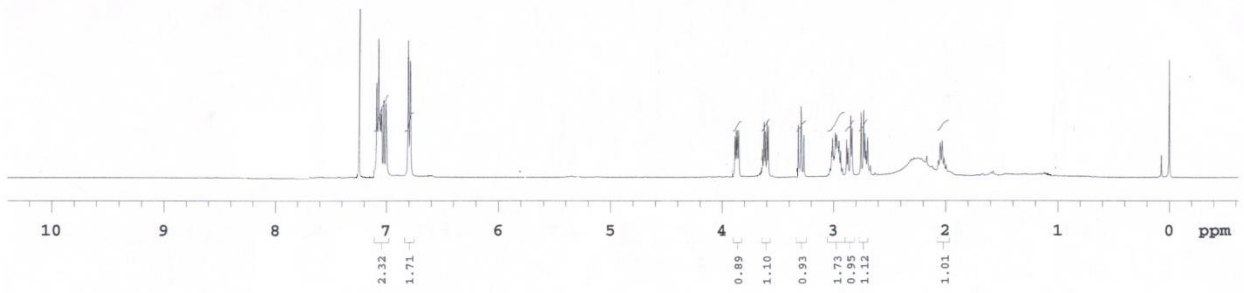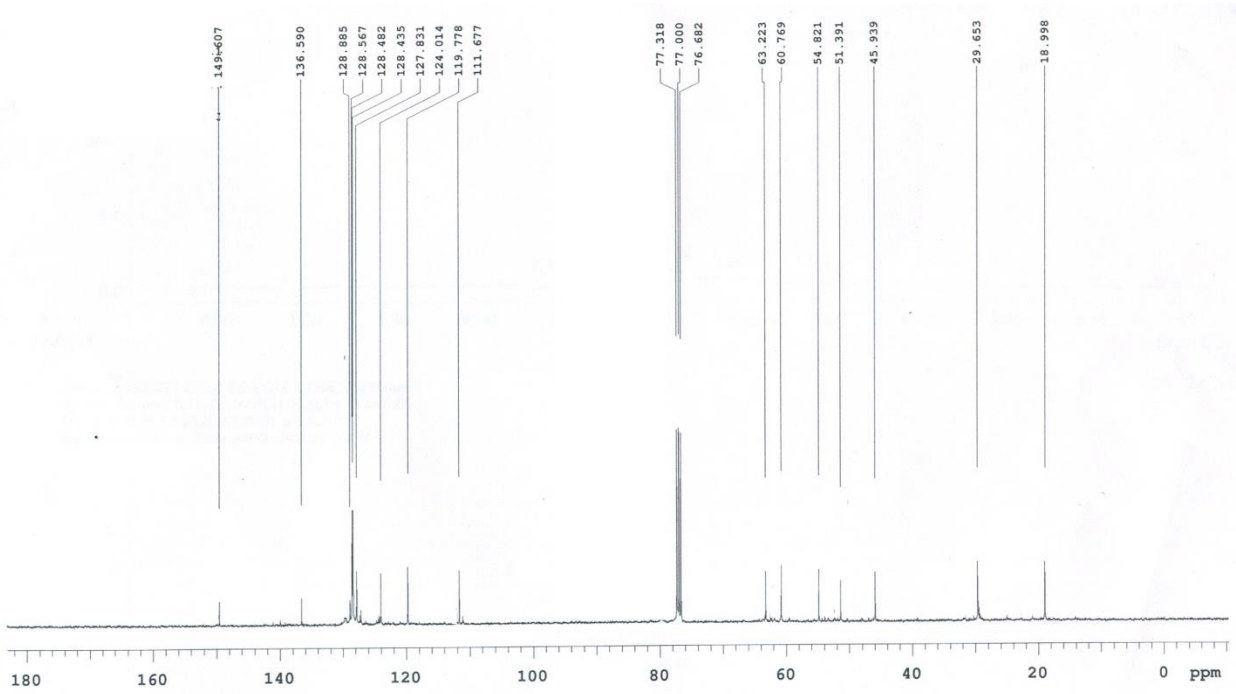



# Compound 16

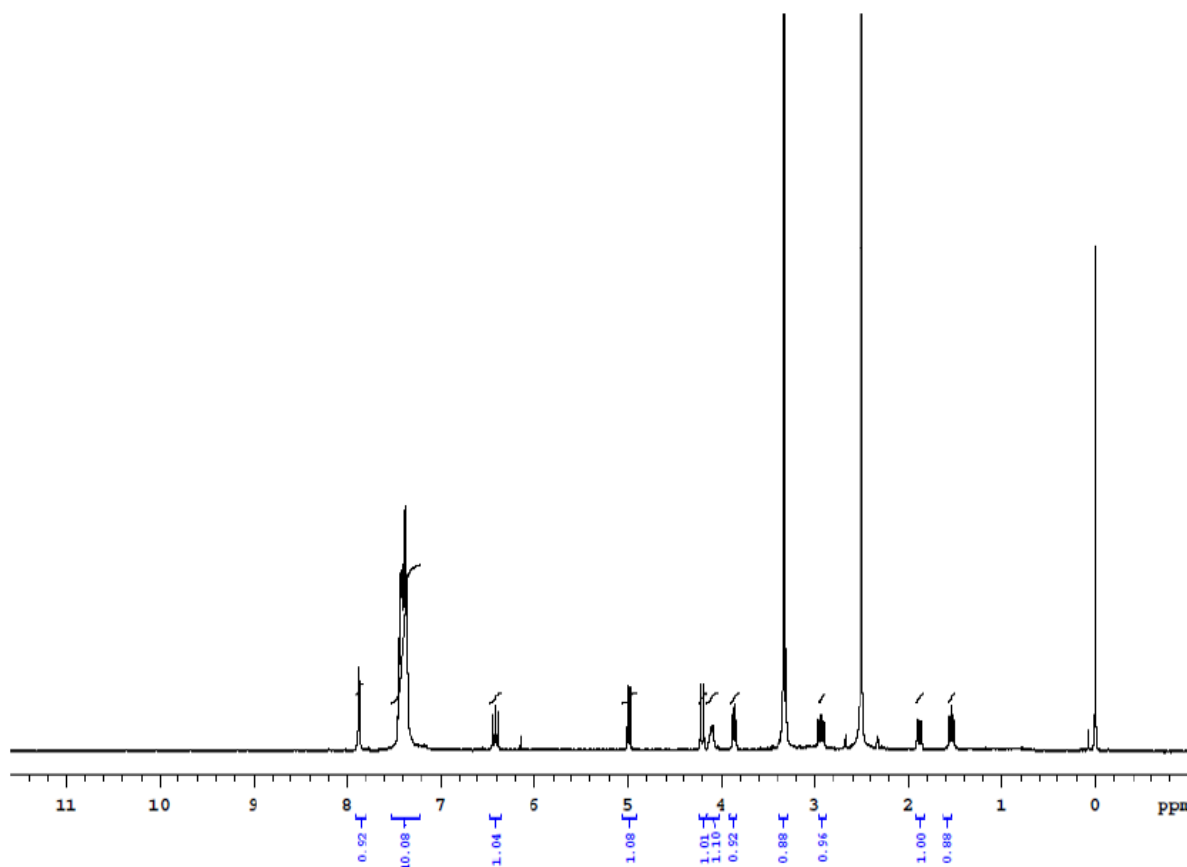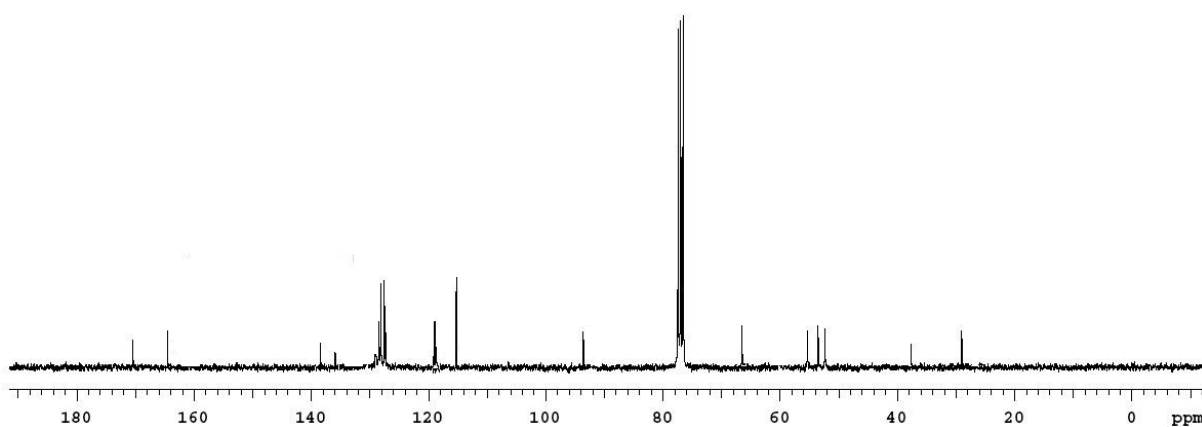

NOE of Compound 5 and 7

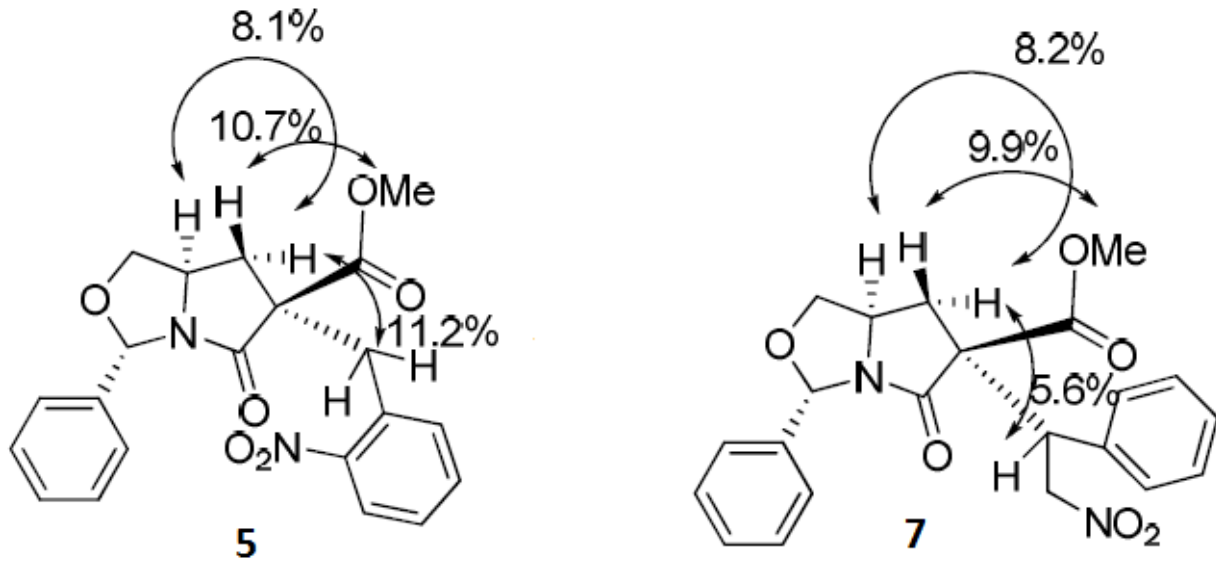

NOE of Compound 4

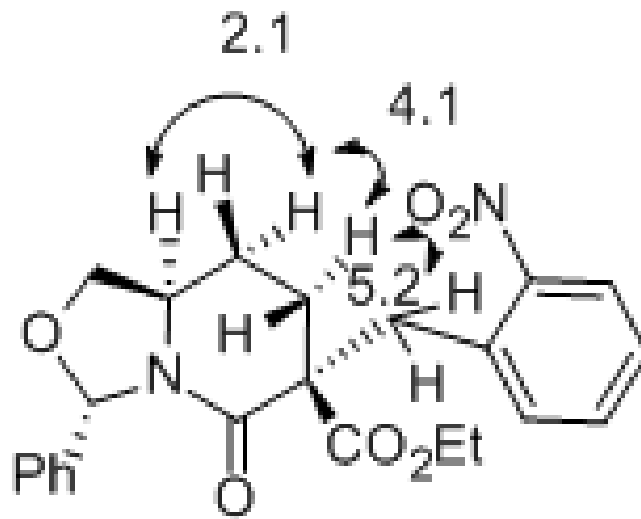

NOE of Compound **11** (also refer the NOESY, DQCOSY and HSQC data below)

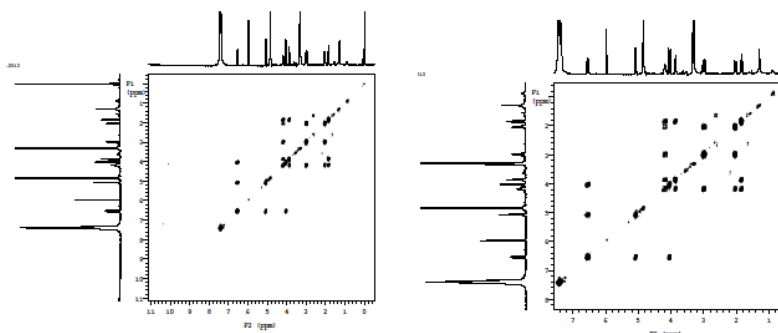

DQCOSY plots of Compound **11**

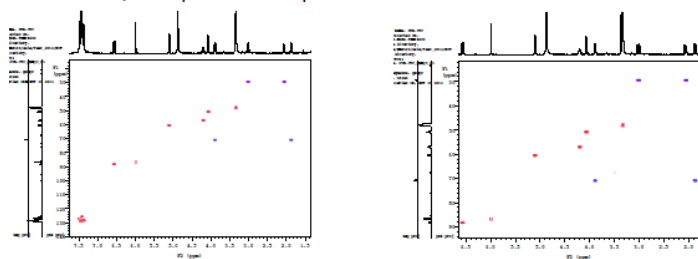

HSQC plots of Compound **11**

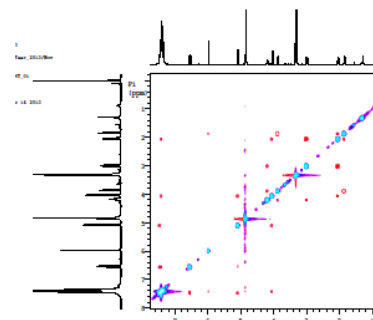

NOESY plot of Compound **11**
